# Supplementary material
Source: MDPI journal article supplement (https://www.mdpi.com/1424-8247/13/11/393)
Supplement: s1 [file s1]

**SUPPORTING INFORMATION FOR:**

**Potent combretastatin A-4 analogues containing quinoline: Design, Synthesis, antiproliferative, and anti-tubulin activity**

Tarek S. Ibrahim <sup>1,2,\*</sup>, Mohamed M. Hawwas <sup>3</sup>, Azizah M. Malebari <sup>1</sup>, Ehab S. Taher <sup>3</sup>, Abdelsattar M. Omar <sup>1,4</sup>, Niamh M. O'Boyle <sup>5</sup>, Eavan McLoughlin <sup>5</sup>, Zakaria K. Abdel-Samii <sup>2</sup>, Yaseen A.M.M. Elshaier <sup>6</sup>

<sup>1</sup> Department of Pharmaceutical Chemistry, Faculty of Pharmacy, King Abdulaziz University, Jeddah, 21589, Saudi Arabia; tmabraham@kau.edu.sa (T.S.I.); amelibary@kau.edu.sa (A.M.M.); asmansour@kau.edu.sa (A.M. O)

<sup>2</sup> Department of Pharmaceutical Organic Chemistry, Faculty of Pharmacy, Zagazig University, Zagazig, 44519, Egypt; tmabraham@kau.edu.sa (T.S.I.); zakariaabdelhamii@yahoo.com (Z.K.A)

<sup>3</sup> Department of Pharmaceutical Organic Chemistry, Faculty of Pharmacy, Al-Azhar University, Assiut, 71524, Egypt. mohhawwas@yahoo.com (M.M.H); ehataher@azhar.edu.eg (E.S.T)

<sup>4</sup> Department of Pharmaceutical Chemistry, Faculty of Pharmacy, Al-Azhar University, Cairo 11884, Egypt. asmansour@kau.edu.sa (A.M. O)

<sup>5</sup> School of Pharmacy and Pharmaceutical Sciences, Trinity College Dublin, Trinity Biomedical Sciences Institute, 152-160 Pearse Street, Dublin 2, Ireland. niamh.oboyle@tcd.ie (N.M.O); mclougea@tcd.ie (E.M)

<sup>6</sup> Department of Organic and Medicinal Chemistry, Faculty of Pharmacy, University of Sadat City, 32958 Menoufia, Egypt. yaseenorganic@yahoo.com (Y.A.M.M.E)

**\*Corresponding authors:**

Tarek S. Ibrahim, Associate Professor, Department of Pharmaceutical Chemistry, Faculty of Pharmacy, King Abdulaziz University, Jeddah, 21589, Saudi Arabia.

**Tel.:** +966535846571

**E-mail address:** tmabraham@kau.edu.sa, tarekeldeeb1976@yahoo.com

## CONTENTS

|                                                                                                                   |    |
|-------------------------------------------------------------------------------------------------------------------|----|
| Selected $^1\text{H}$ and $^{13}\text{C}$ NMR Spectra for Compounds <b>19a-j</b> and <b>20a-j</b>                 | 3  |
| Molecular docking at the colchicine-binding site of tubulin for quinolines <b>19b</b> , <b>20c</b> and <b>20g</b> | 25 |
| 2D Ligand Interaction Schematic for <b>19b</b>                                                                    | 27 |
| 2D Ligand Interaction Schematic for <b>20c</b>                                                                    | 28 |
| 2D Ligand Interaction Schematic for <b>20g</b>                                                                    | 29 |

Figure S1;  $^1\text{H}$  NMR for compound 19a

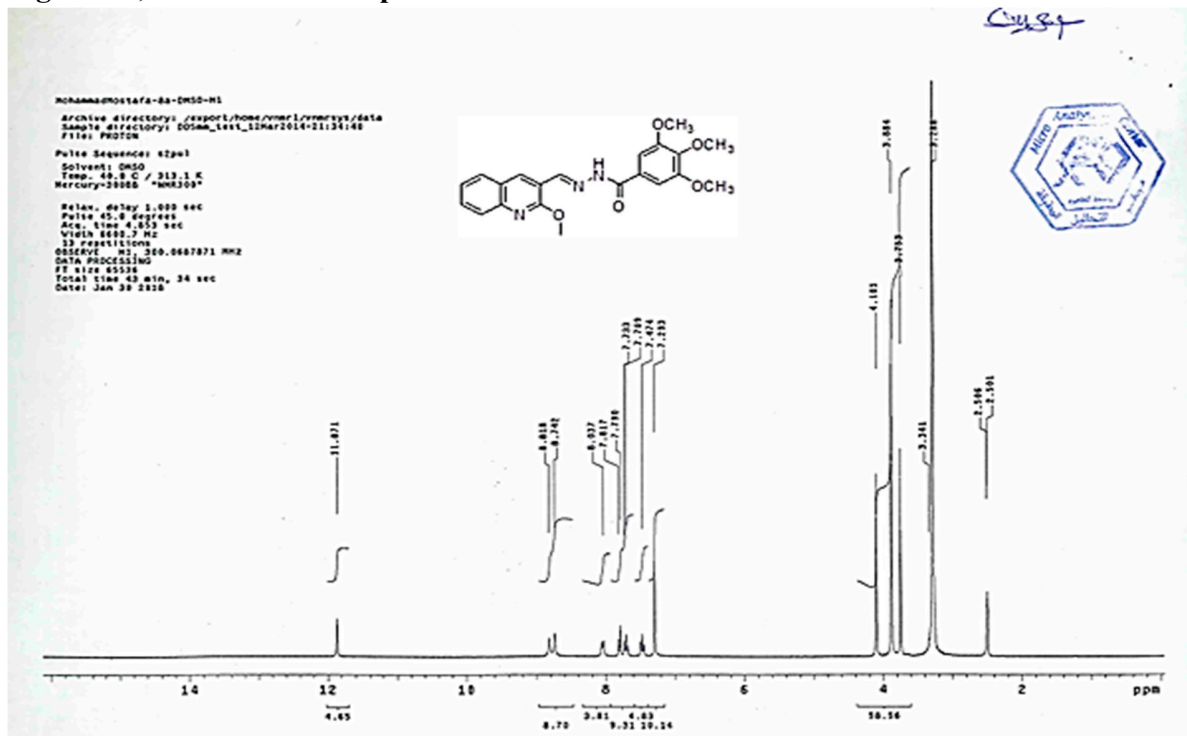

Figure S2;  $^{13}\text{C}$  NMR for compound 19a

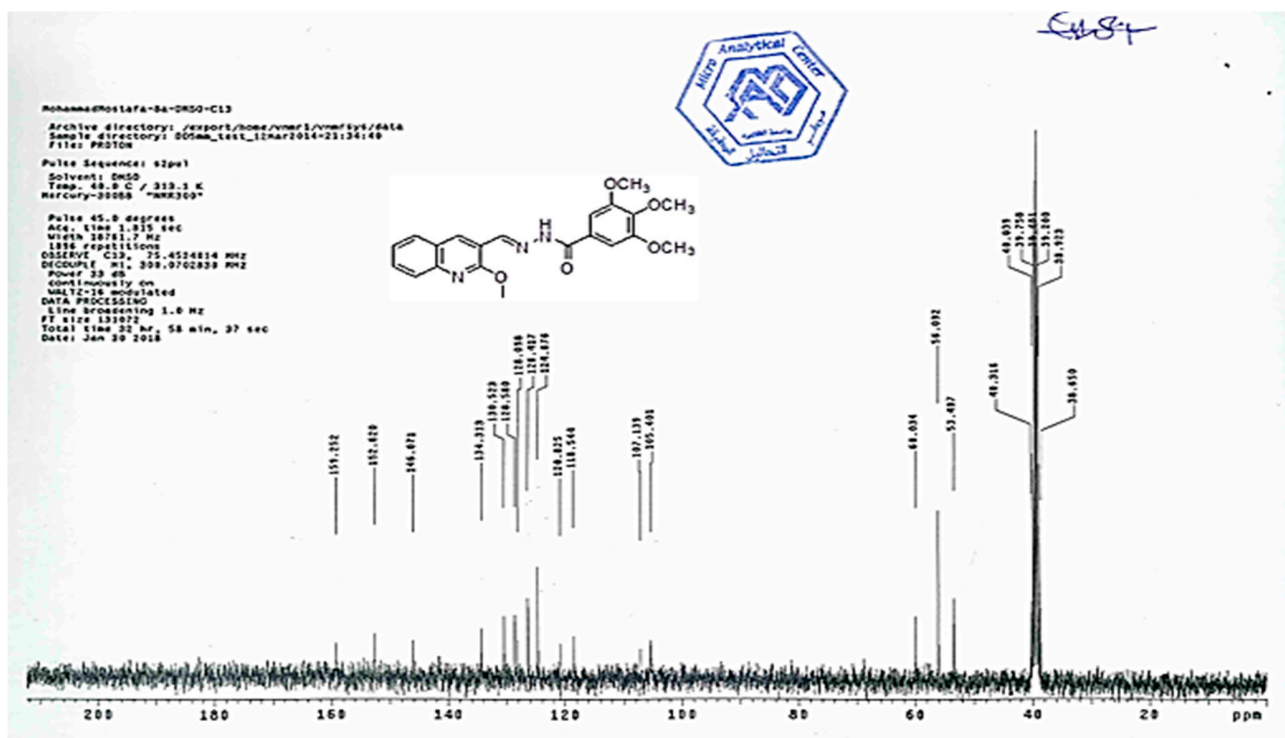

**Figure S3;  $^1\text{H}$  NMR for compound 19b**

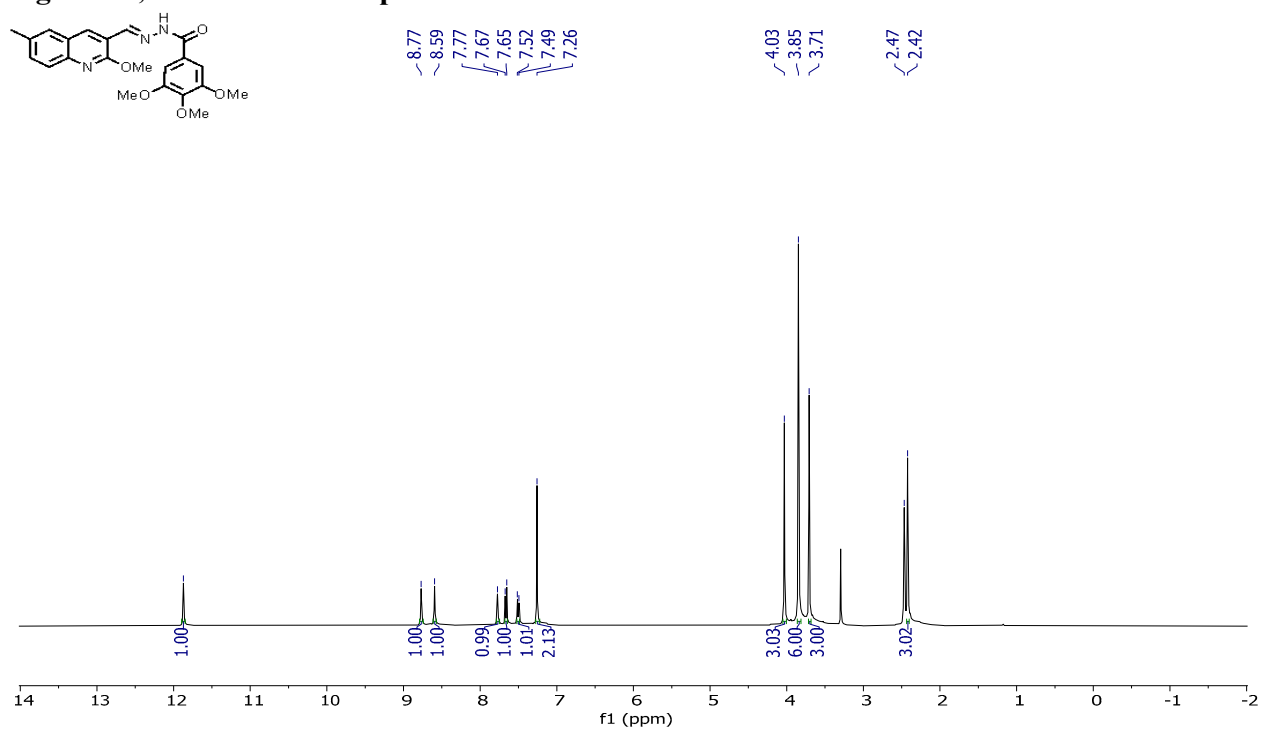

**Figure S4;  $^{13}\text{C}$  NMR for compound 19b**

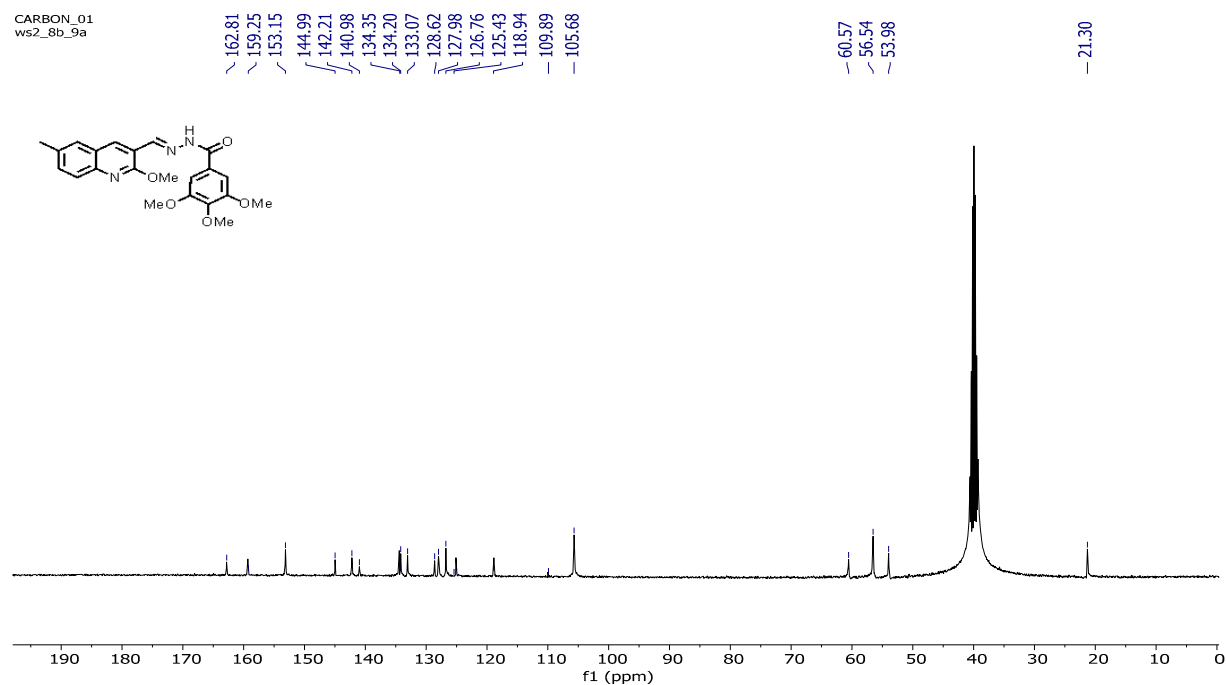

Figure S5;  $^1\text{H}$  NMR for compound 19c

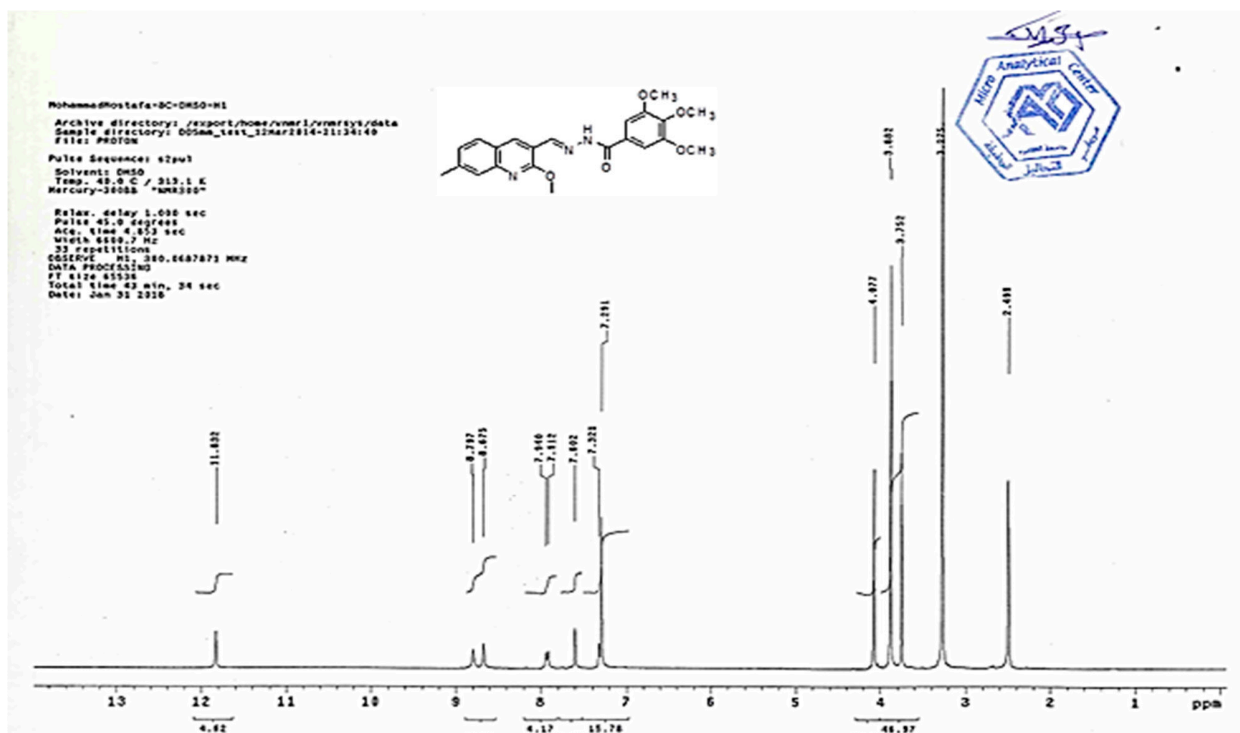

Figure S6;  $^{13}\text{C}$  NMR for compound 19c

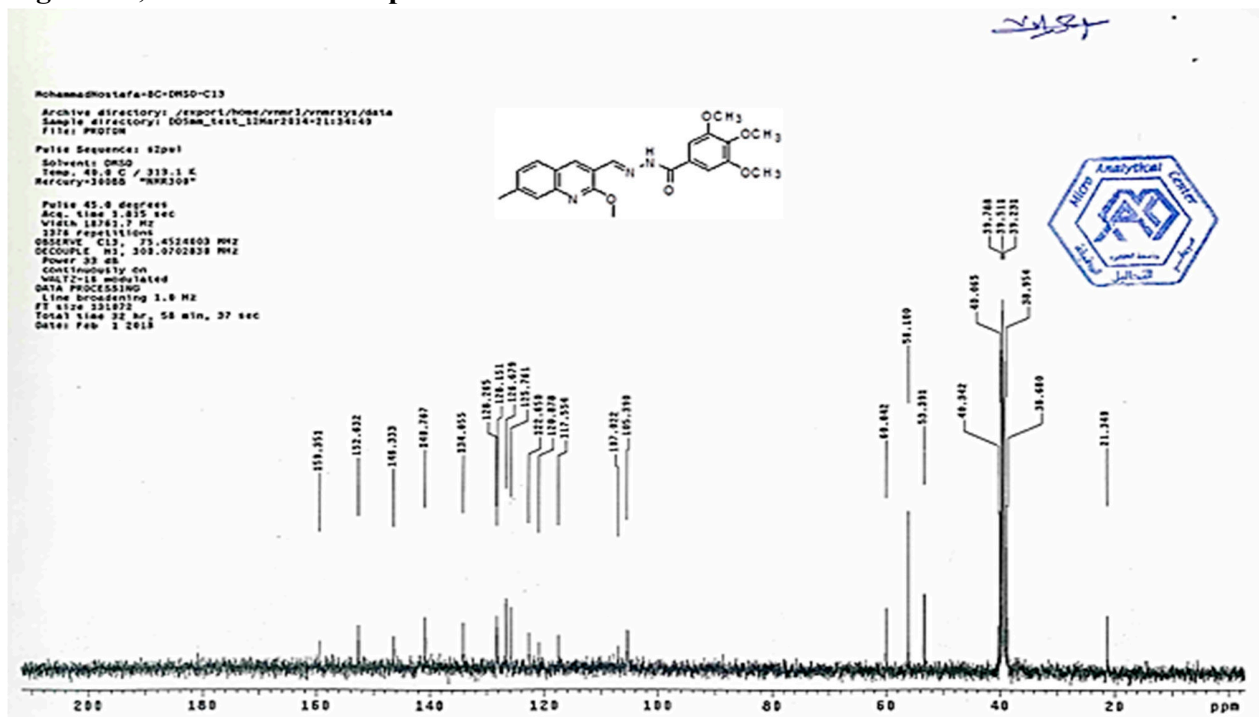

Figure S7; <sup>1</sup>H NMR for compound 19d

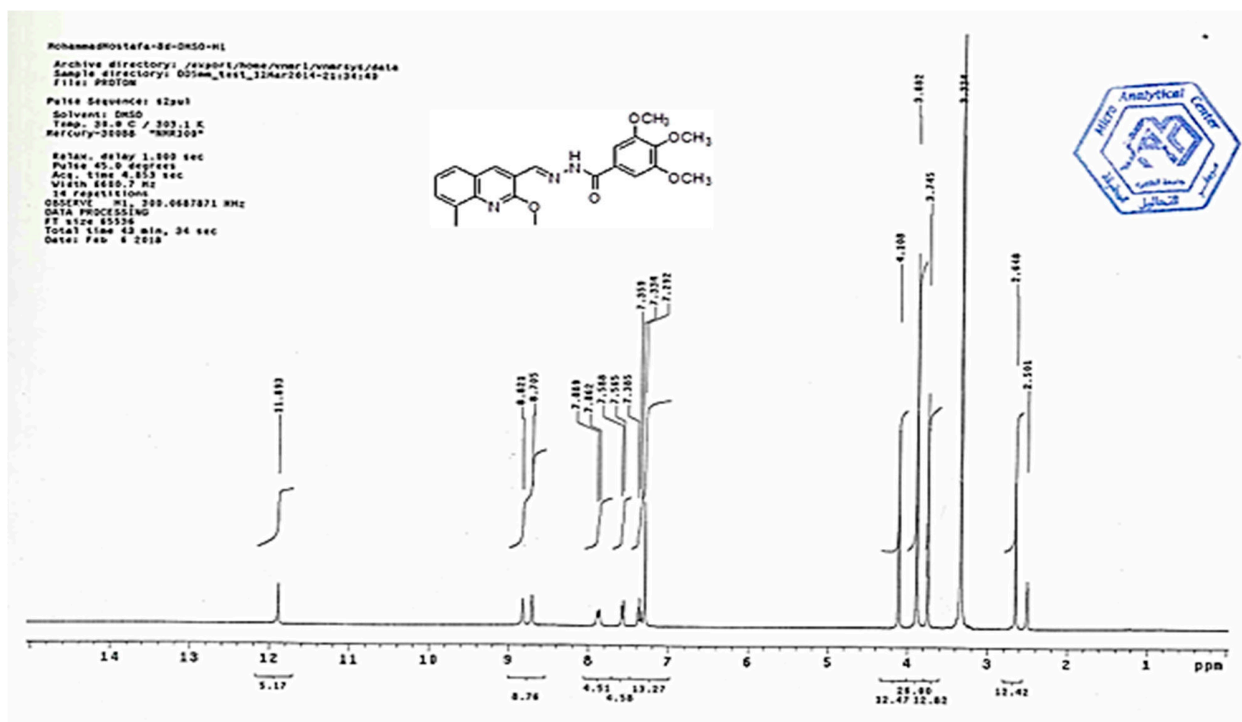

Figure S8; <sup>13</sup>C NMR for compound 19d

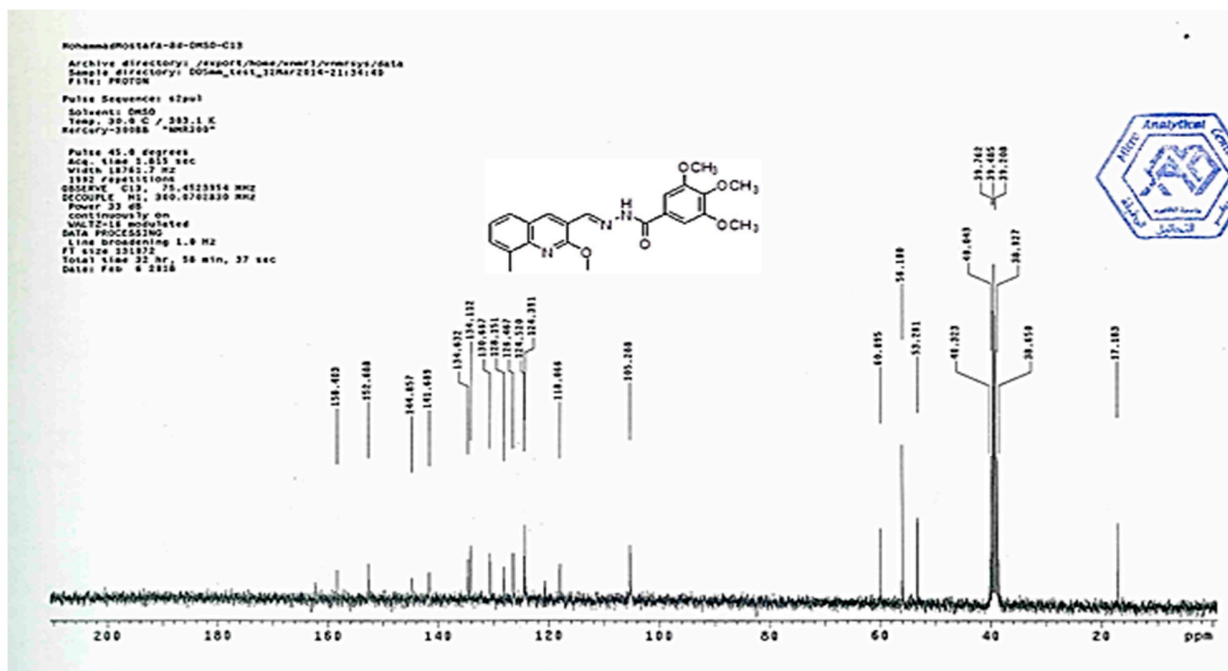

**Figure S9;  $^1\text{H}$  NMR for compound 19e**

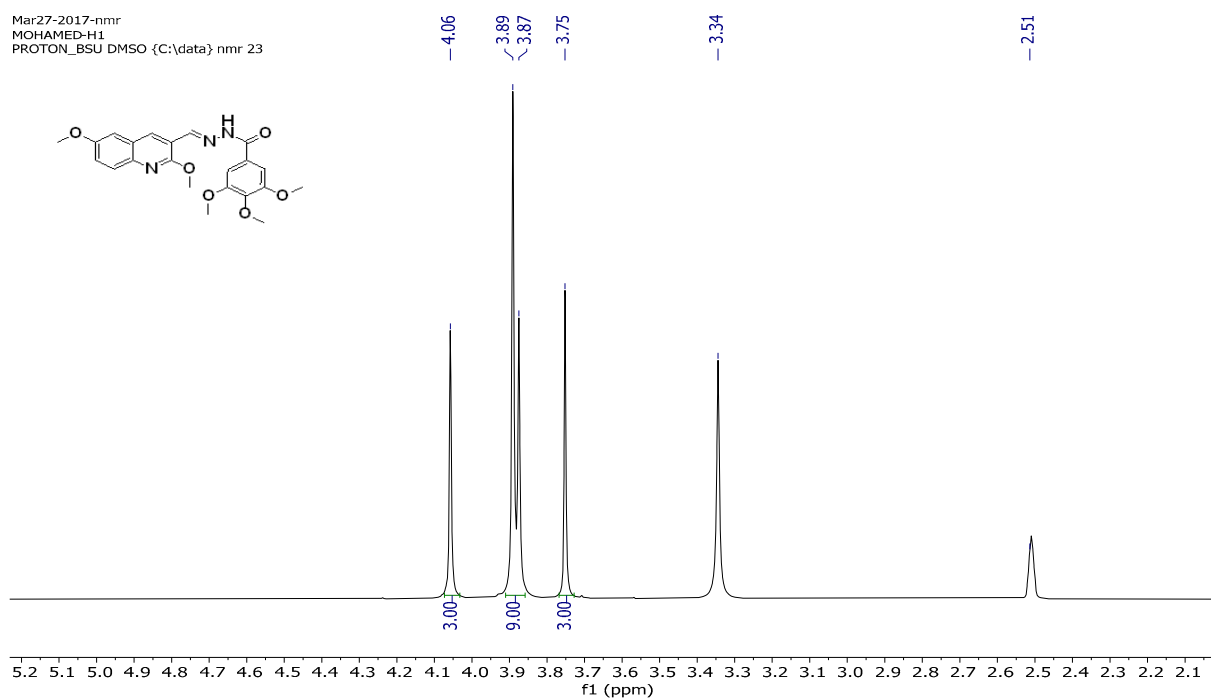

**Figure S10;  $^{13}\text{C}$  NMR for compound 19e**

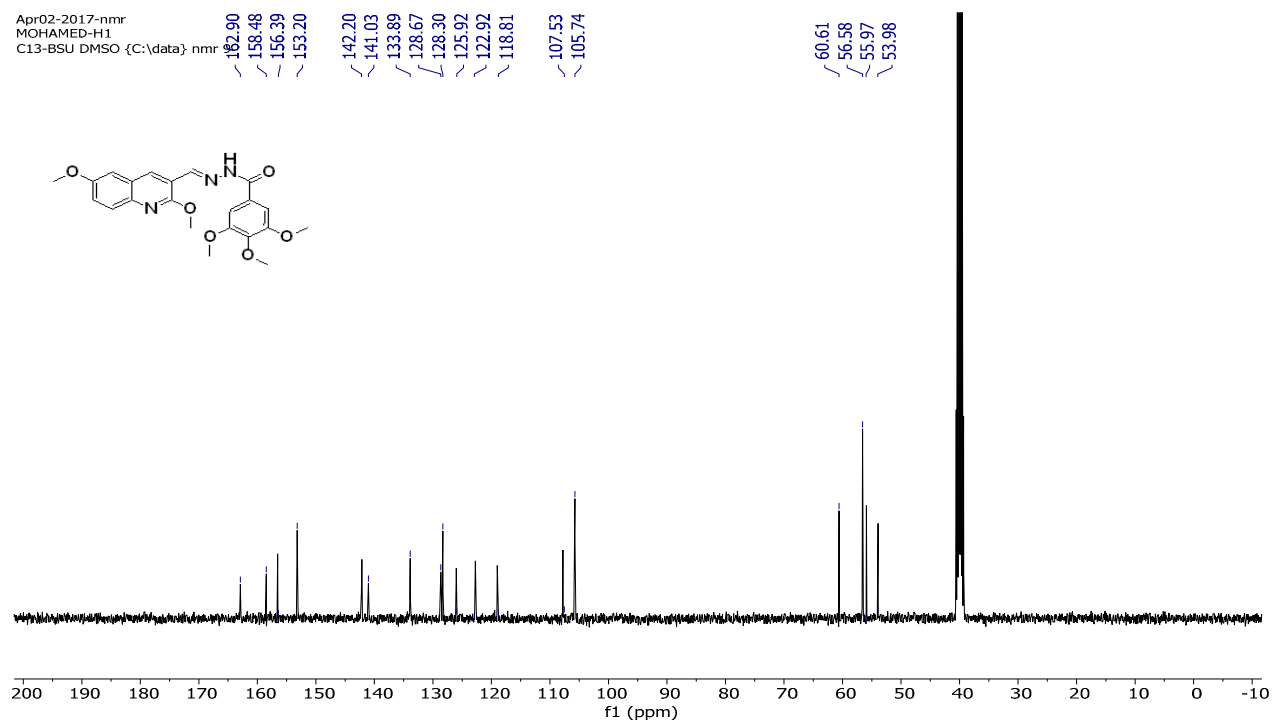

MOHAMMADHOSSAFA-SF-DMSO-H1

Archive directory: \export\hose\vwv\1\vwv\sys\data  
Sample directory: OCSm\_test\_22Mar2016-22124149  
File: PROTON

Pulse Sequence: zgpu1  
Solvent: DMSO  
Temp: 30.0 C / 269.1 K  
Mercury-300SB "hmq3360"

Relax. delay 1.000 sec  
Pulse: 45.0 degrees  
Acq. time 4.855 sec  
Width 6609.7 Hz  
31 Repetitions  
OBSERVE: HS, 300.9687871 MHz  
DATA PROCESSING  
FT size 85536  
Total time 43 min, 34 sec  
Date: Feb 8 2016

COc1cc(OC)c(C(=O)Nc2cc3cc(OC)cc(O)c3nc2C4=CC=CC=C4O)cc1OC

11.424  
8.233  
8.165  
7.972  
7.942  
7.262  
7.186  
7.137  
7.125  
7.114  
7.095  
7.068  
4.075  
3.917  
3.773  
3.334  
2.511

4.15  
7.16  
3.74  
17.39  
69.76  
4.15

ppm

MohammedMostafa-87-DMSO-C13

Archive directory: /exp01/home/vnmr3/vnmrfsys/ATAA  
Sample directory: D05mm\_test\_12Mar2014-21:34:49  
File: F02108

Pulse Sequence: zgpg30  
Solvent: DMSO  
Temp: 30.0 C / 360.3 K  
Acquire: 30588 "nmr330"

Pulse 45.0 degrees  
Acc. time 1.815 sec  
Width 12741.7 Hz  
2458 Repetitions  
Observed C13: 75.4522843 MHz  
Decouple H1: 309.0702339 MHz  
Power 33 dB  
continuously on  
VHFP+18 modulated  
DATA PROCESSING  
line broadening 3.0 Hz  
F2 size 131972  
Total time 20 hr, 58 min, 37 sec  
Date: Feb 7 2018

COC1=CC(=C(C=C1)C(=N/C=N/C(=O)C2=CC(OC)=C(OC)C2)C3=CC(OC)=CC=C3)

40.454, 39.272, 39.160, 39.129, 38.842, 36.461, 46.395, 56.316, 56.111, 55.308, 55.239, 115.710, 116.740, 116.855, 117.515, 118.261, 118.419, 136.169, 142.400, 148.215, 155.496, 159.417, 161.515

ppm

Atomic Analytical Center  
مركز التحليل الذري  
جامعة القاهرة  
Cairo University



Figure S13;  $^1\text{H}$  NMR for compound 19g

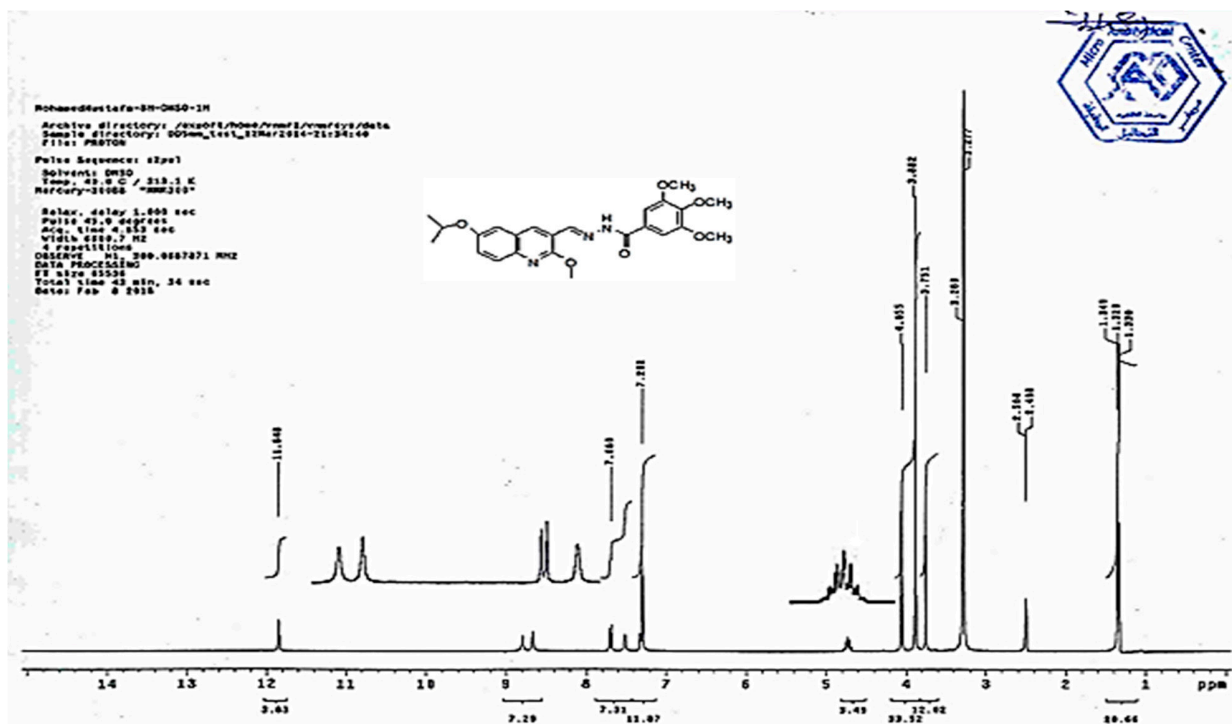

Figure S14;  $^{13}\text{C}$  NMR for compound 19g

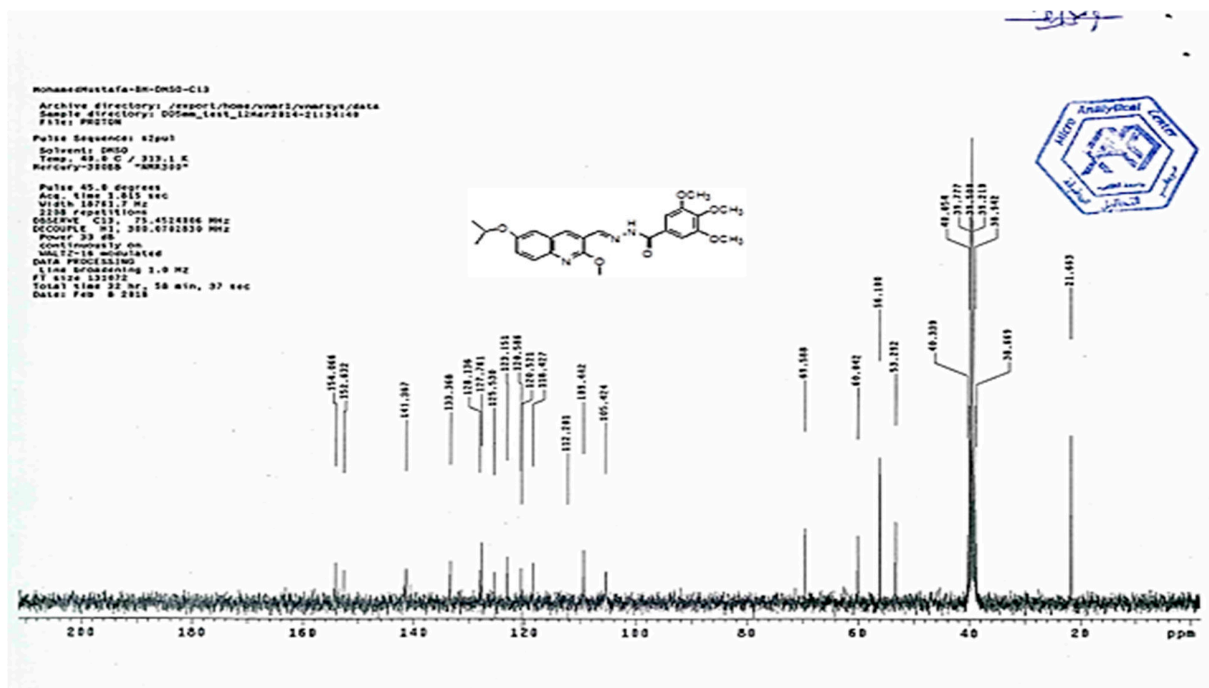

Figure S15;  $^1\text{H}$  NMR for compound 19h

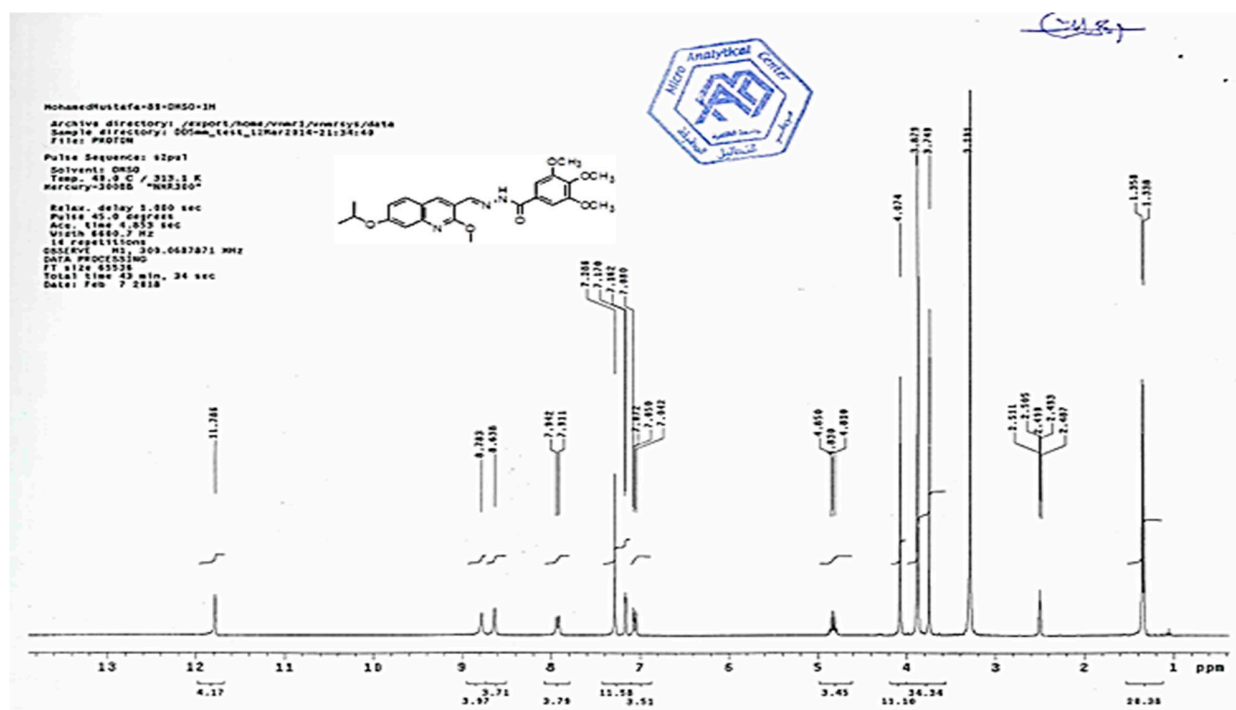

Figure S16;  $^{13}\text{C}$  NMR for compound 19h

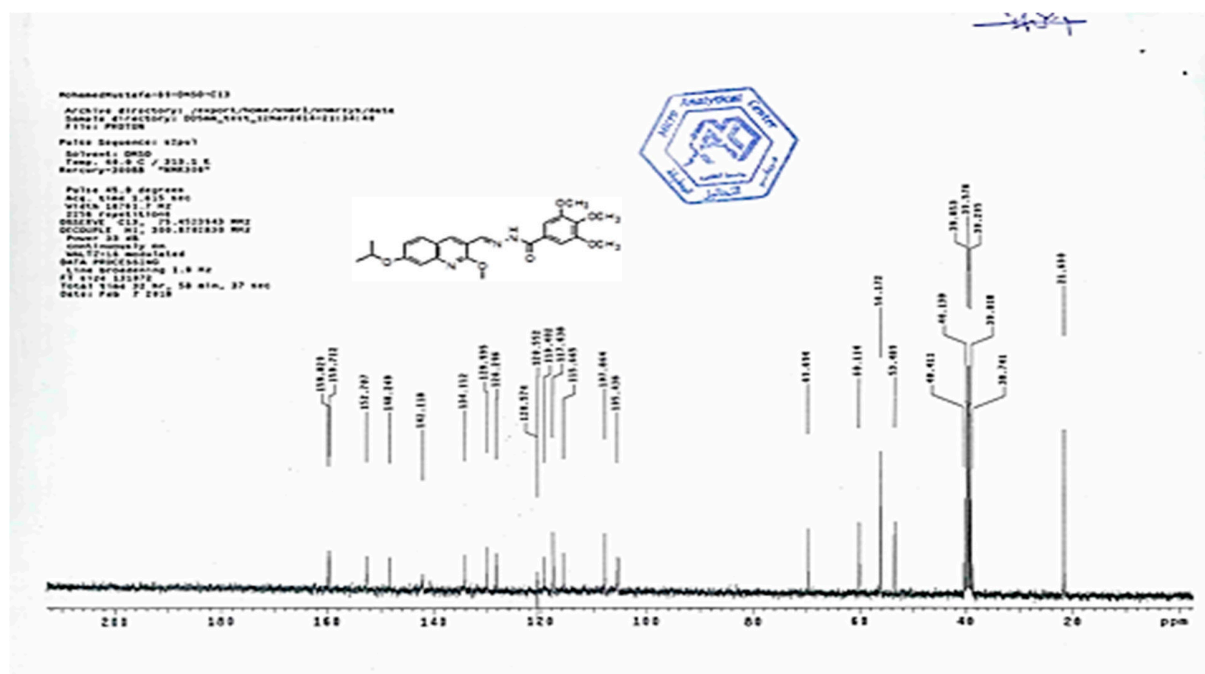

**Figure S17;  $^1\text{H}$  NMR for compound 19i**

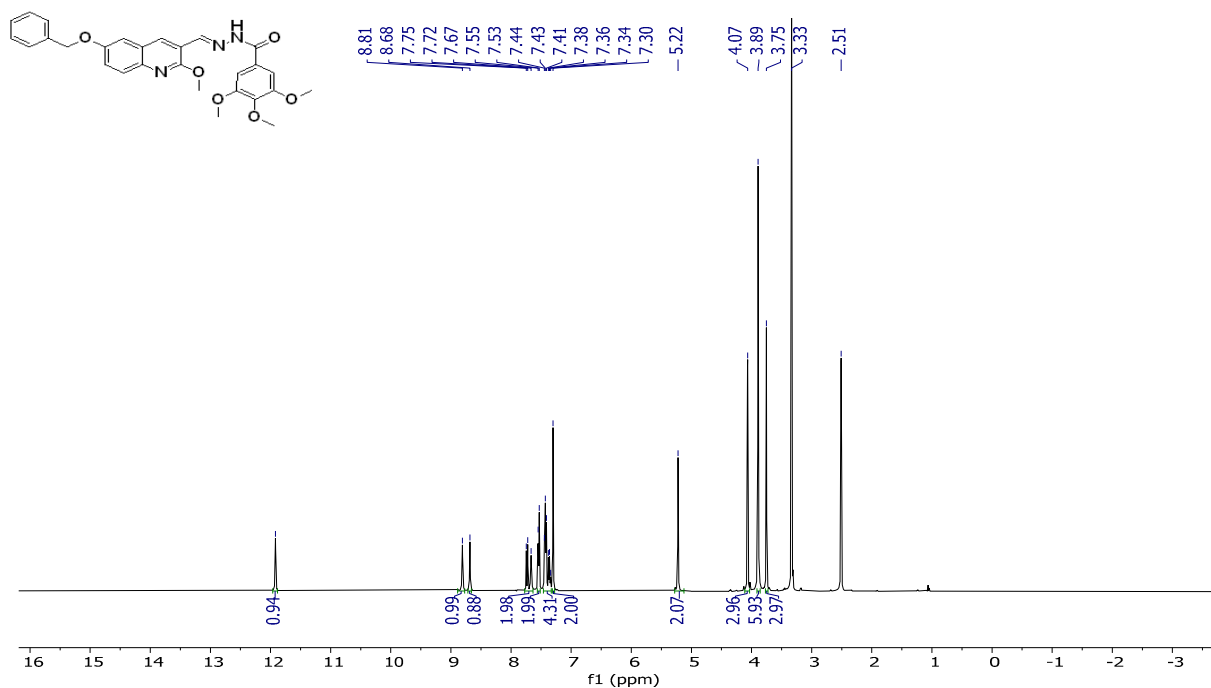

**Figure S18;  $^{13}\text{C}$  NMR for compound 19i**

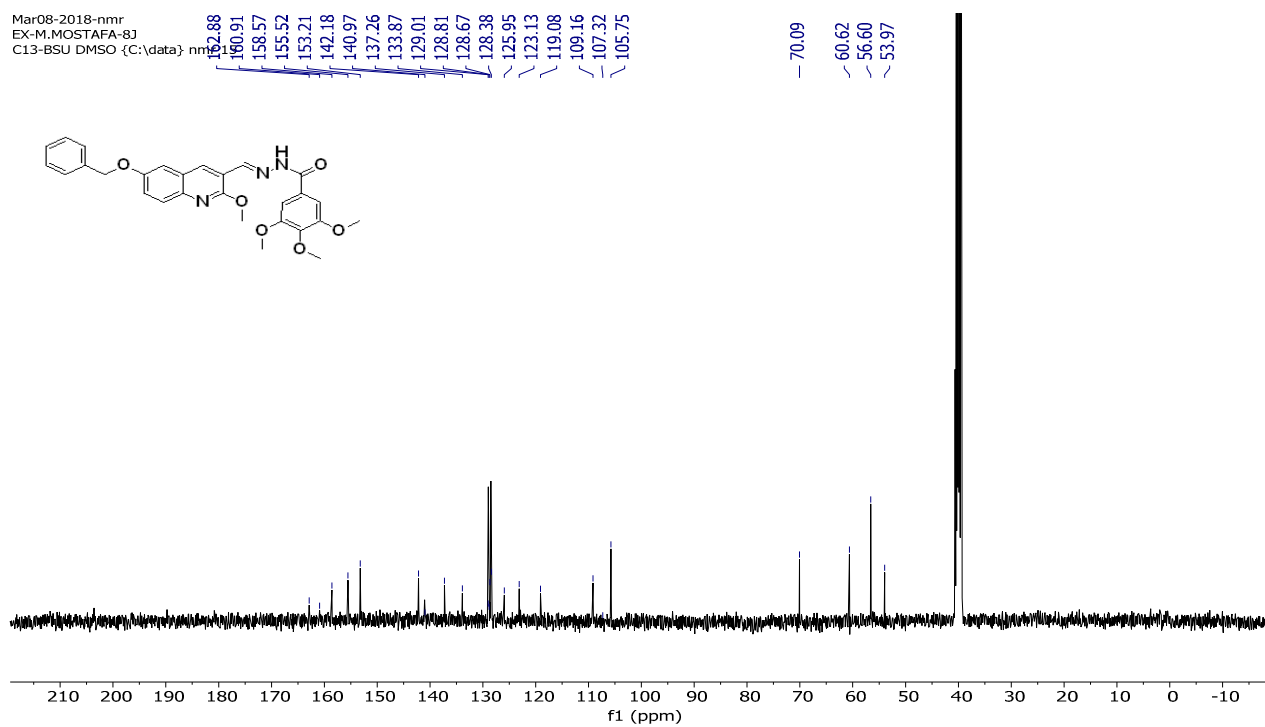

Figure S19;  $^1\text{H}$  NMR for compound 19j

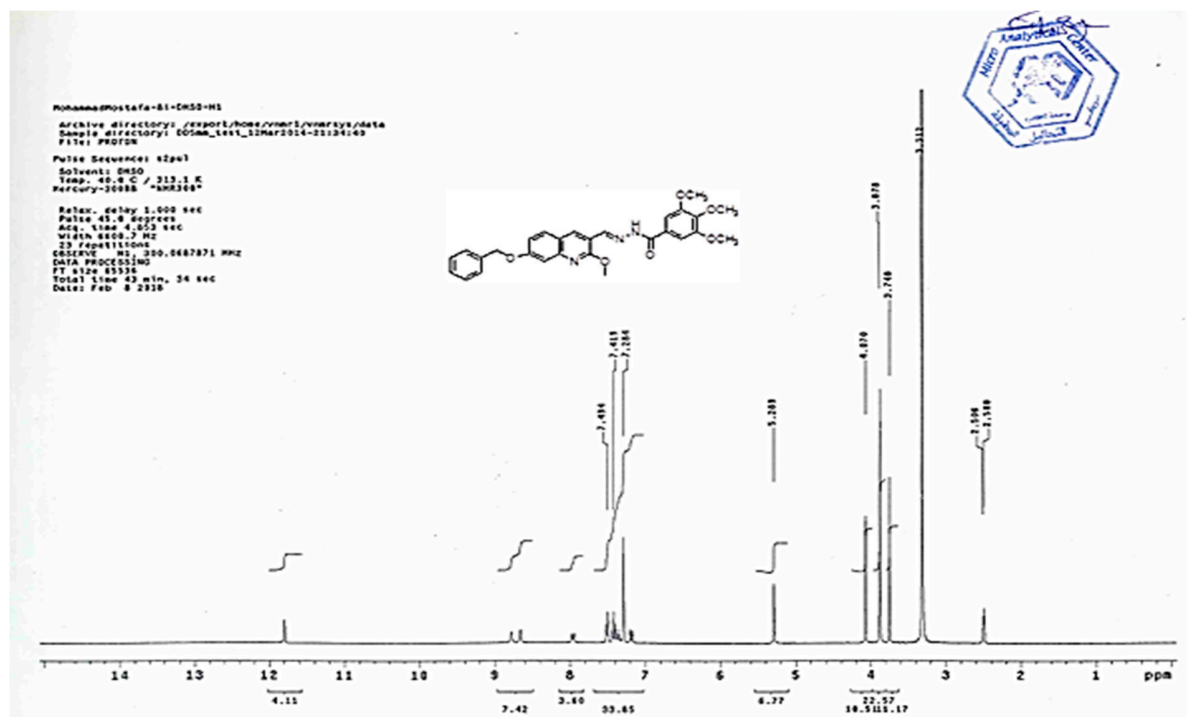

Figure S20;  $^{13}\text{C}$  NMR for compound 19j

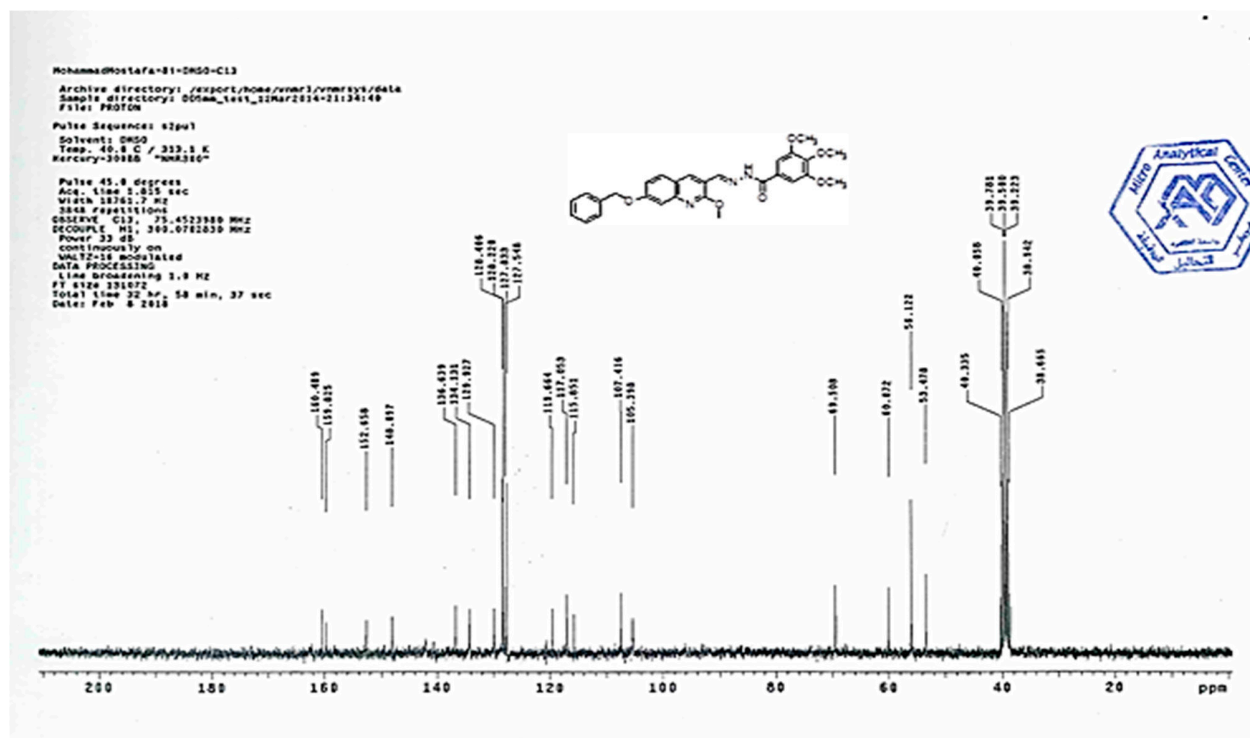

**Figure S21;  $^1\text{H}$  NMR for compound 20a**

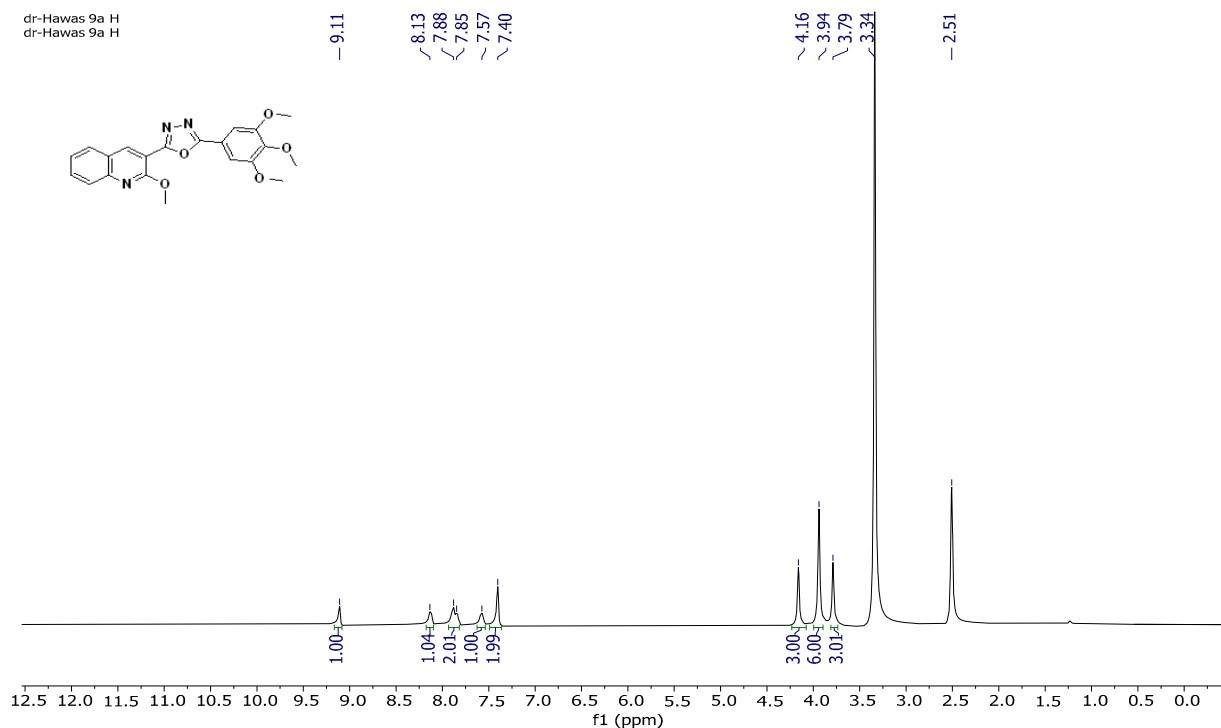

**Figure S22;  $^{13}\text{C}$  NMR for compound 20a**

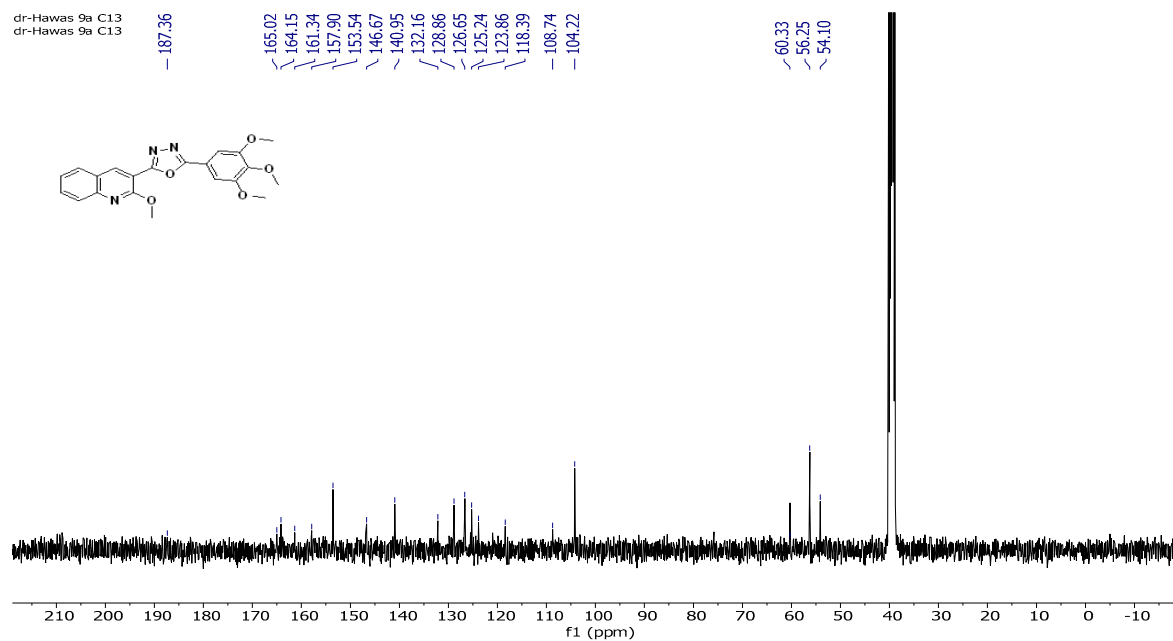

**Figure S23;  $^1\text{H}$  NMR for compound 20b**

Jul02-2018-abeer  
M MOSTAFA-9B  
PROTON\_BS0 DMSO {C:\data\} abeer 11

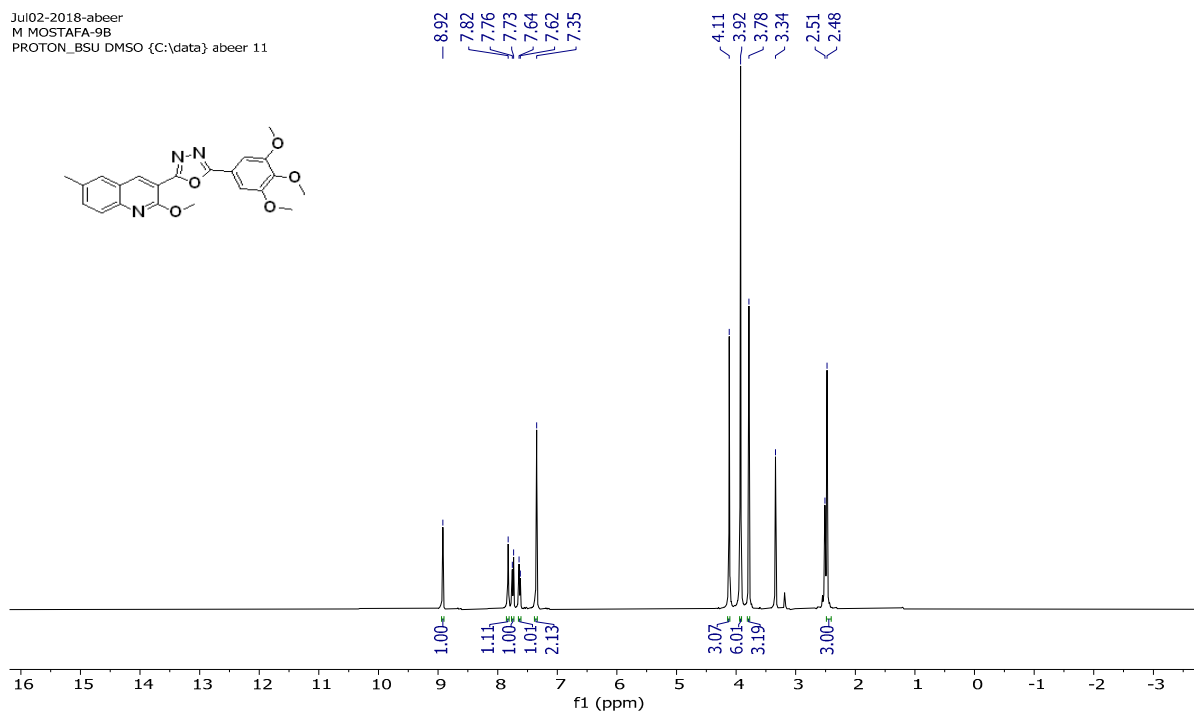

**Figure S24;  $^{13}\text{C}$  NMR for compound 20b**

dr-Hawas 9b C13  
dr-Hawas 9b C13

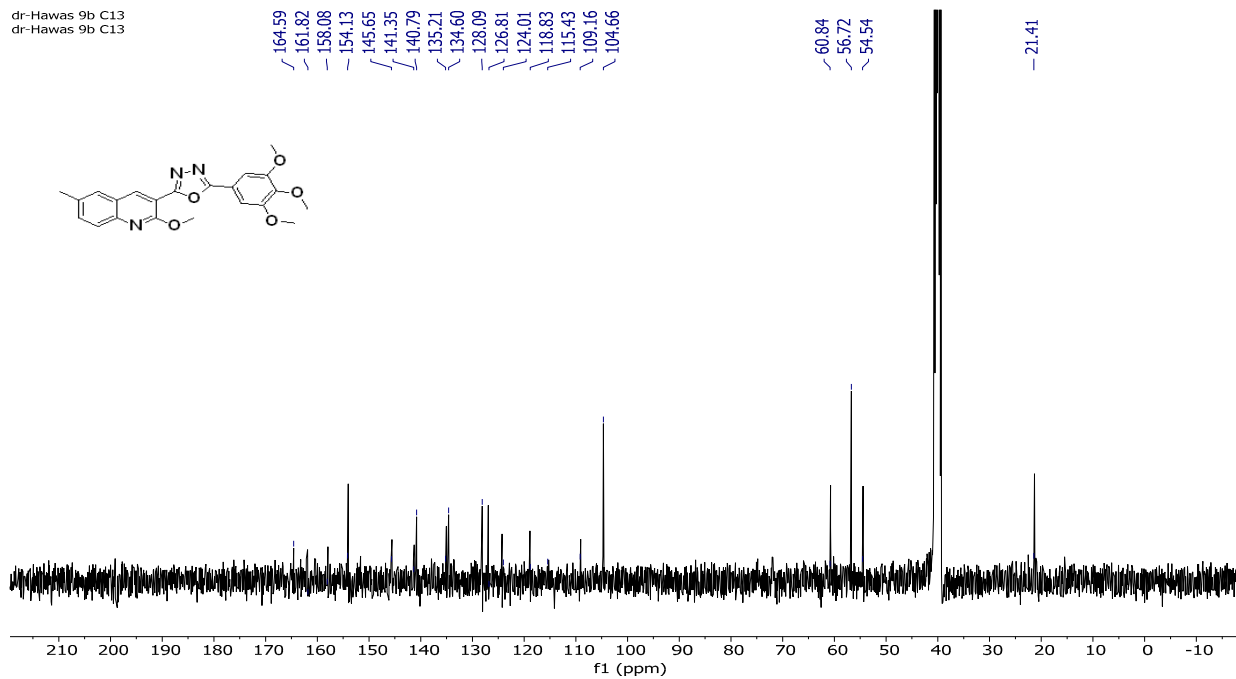

Figure S25;  $^1\text{H}$  NMR for compound 20c

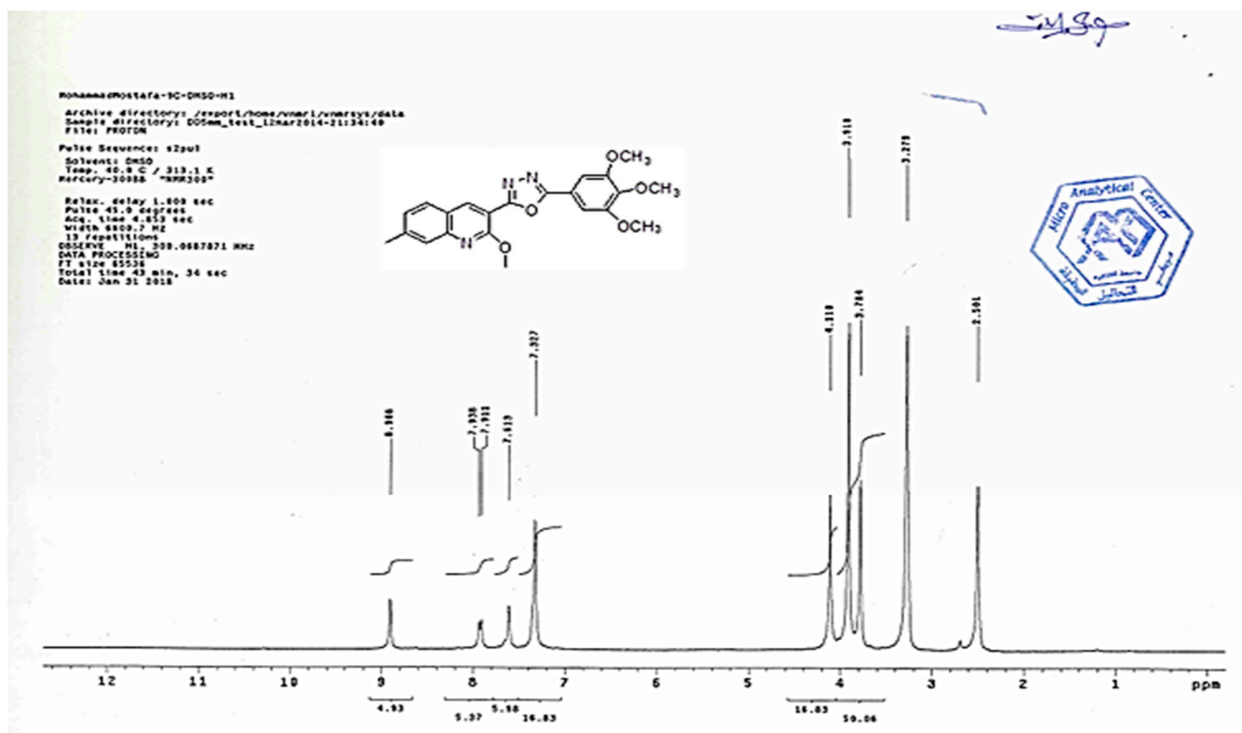

Figure S26;  $^{13}\text{C}$  NMR for compound 20c

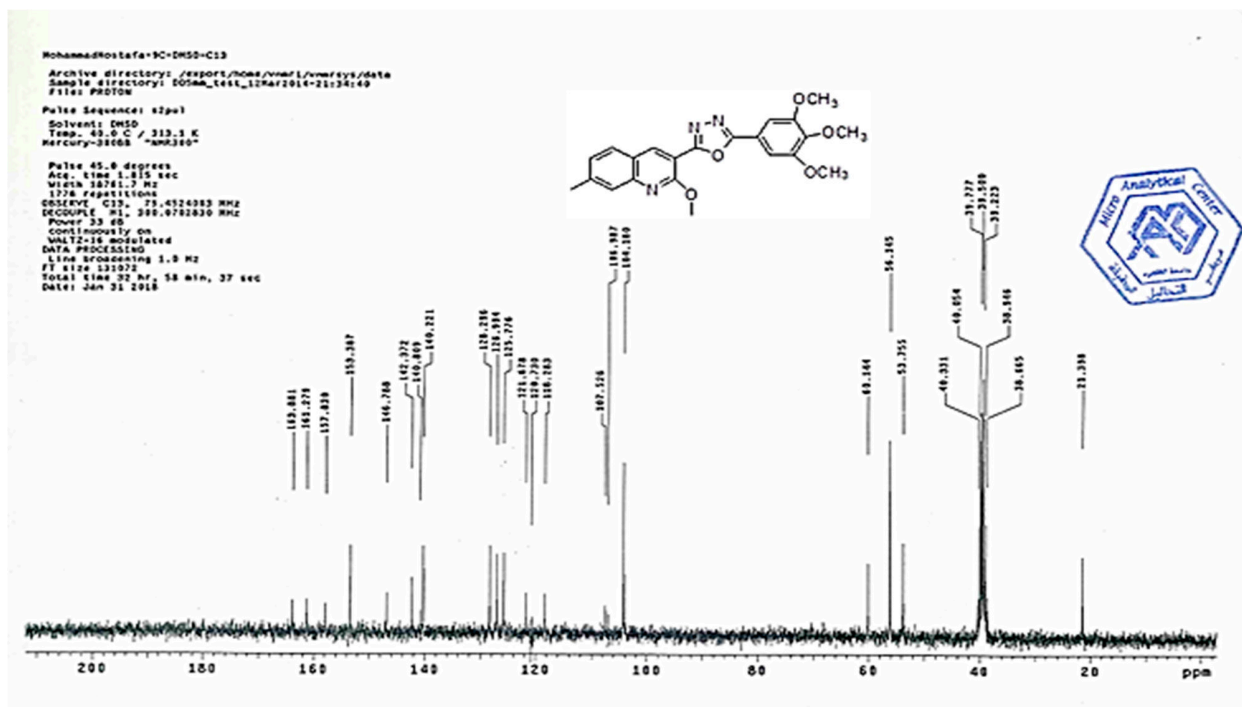

**Figure S27;  $^1\text{H}$  NMR for compound 20d**

Jul02-2018-abeer  
M MOSTAFA-9D  
PROTON\_BS DMSO {C:\data\} abeer 10

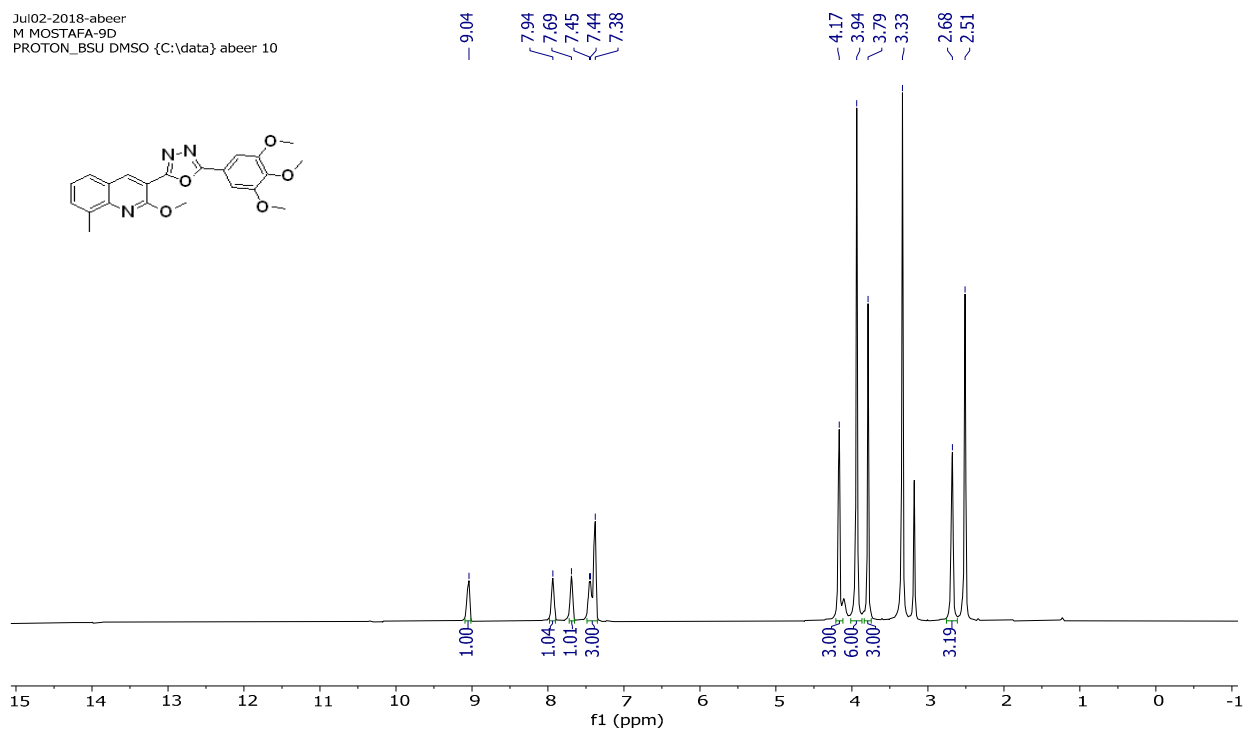

**Figure S28;  $^{13}\text{C}$  NMR for compound 20d**

dr-Hawas 9d C13  
dr-Hawas 9d C13

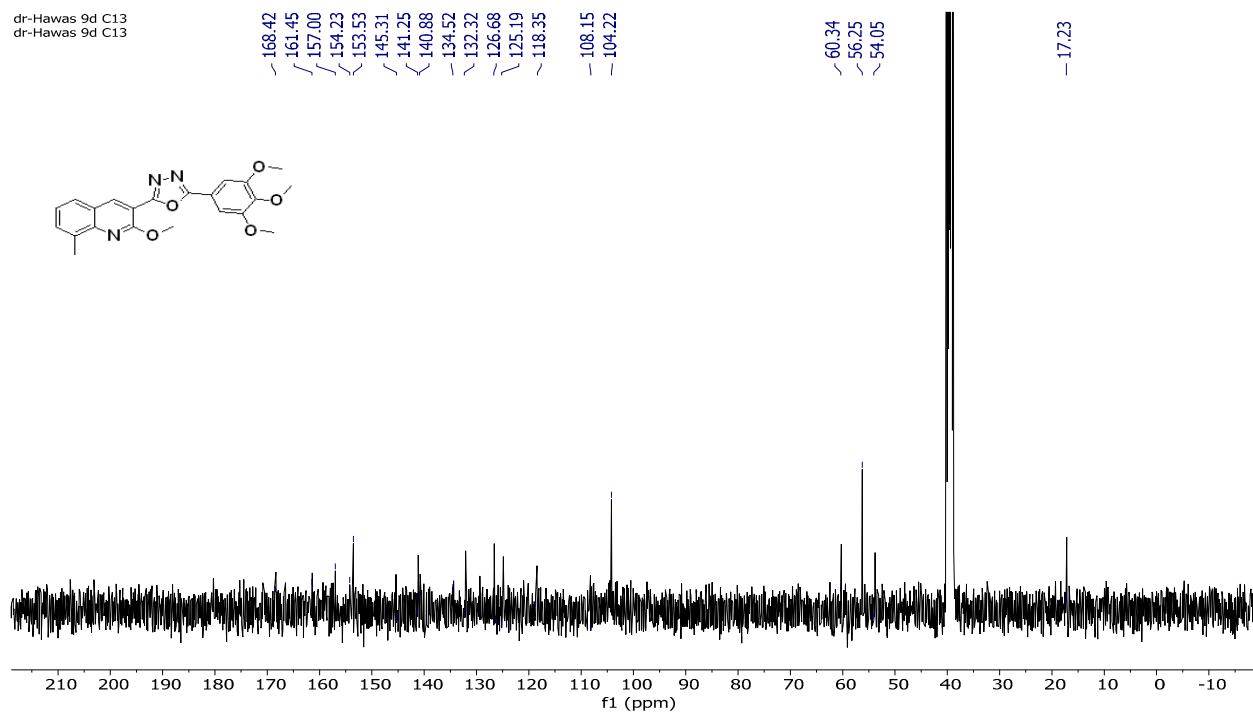



**Figure S29;  $^1\text{H}$  NMR for compound 20e**

Mar27-2017-nmr  
MOHAMED-D1  
PROTON\_BSUS DMSO {C:\data} nmr 24

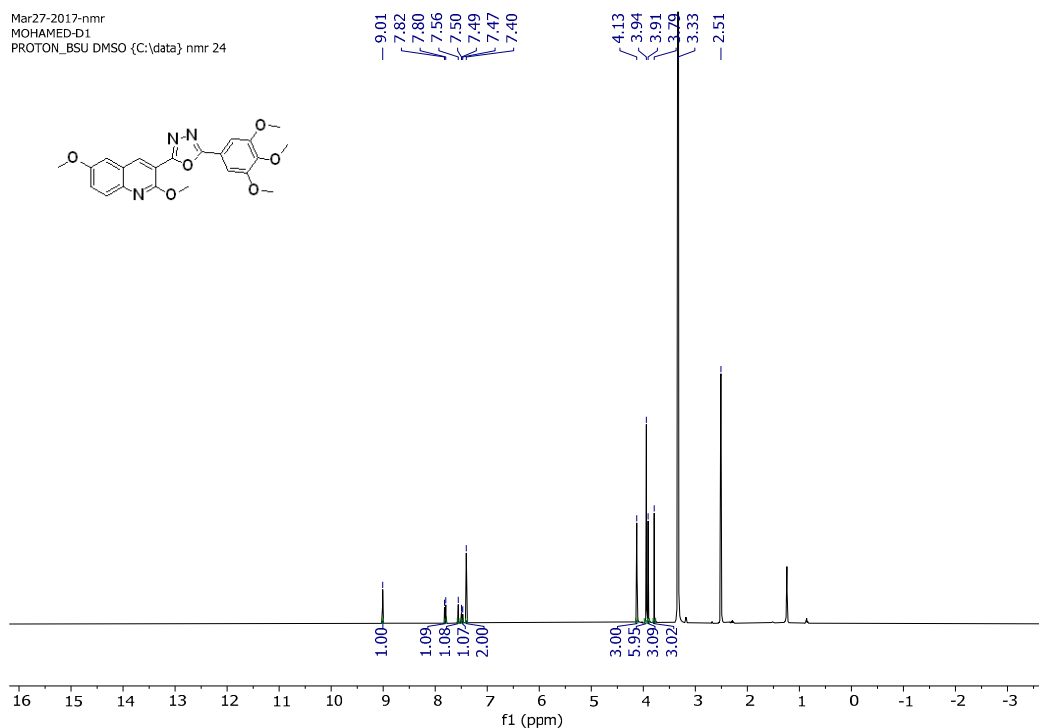

**Figure S30;  $^{13}\text{C}$  NMR for compound 20e**

Apr05-2017-nmr  
MOHAMED-D1  
C13-BSUS DMSO {C:\data} nmr

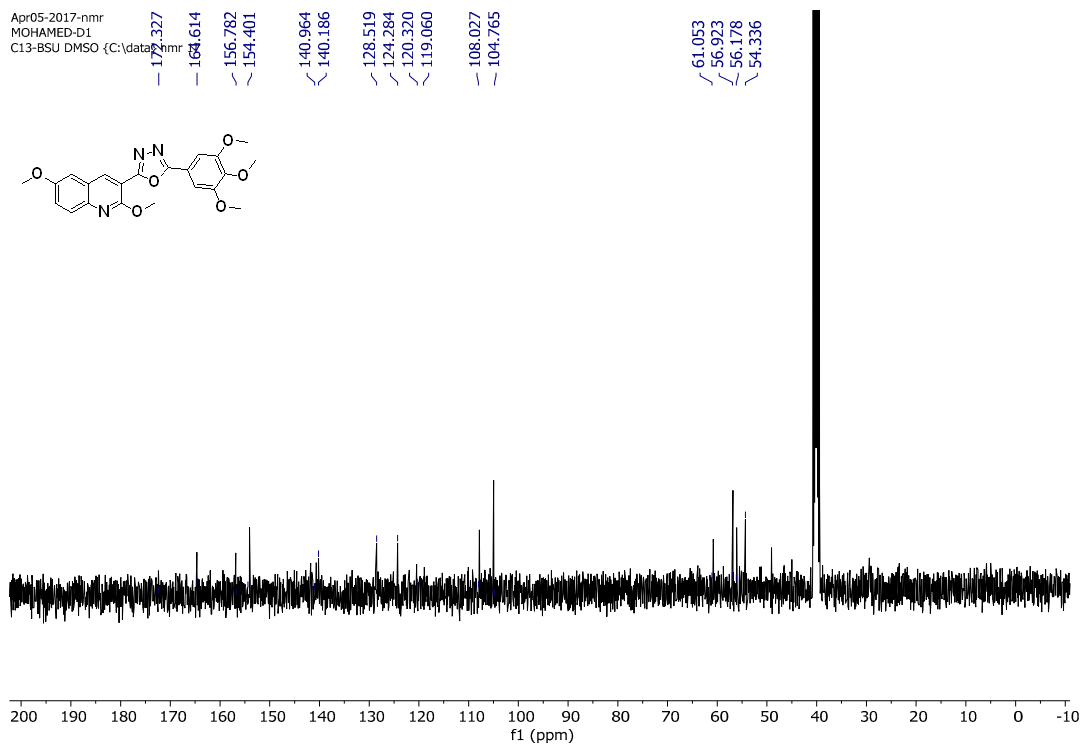

**Figure S31;  $^1\text{H}$  NMR for compound 20f**

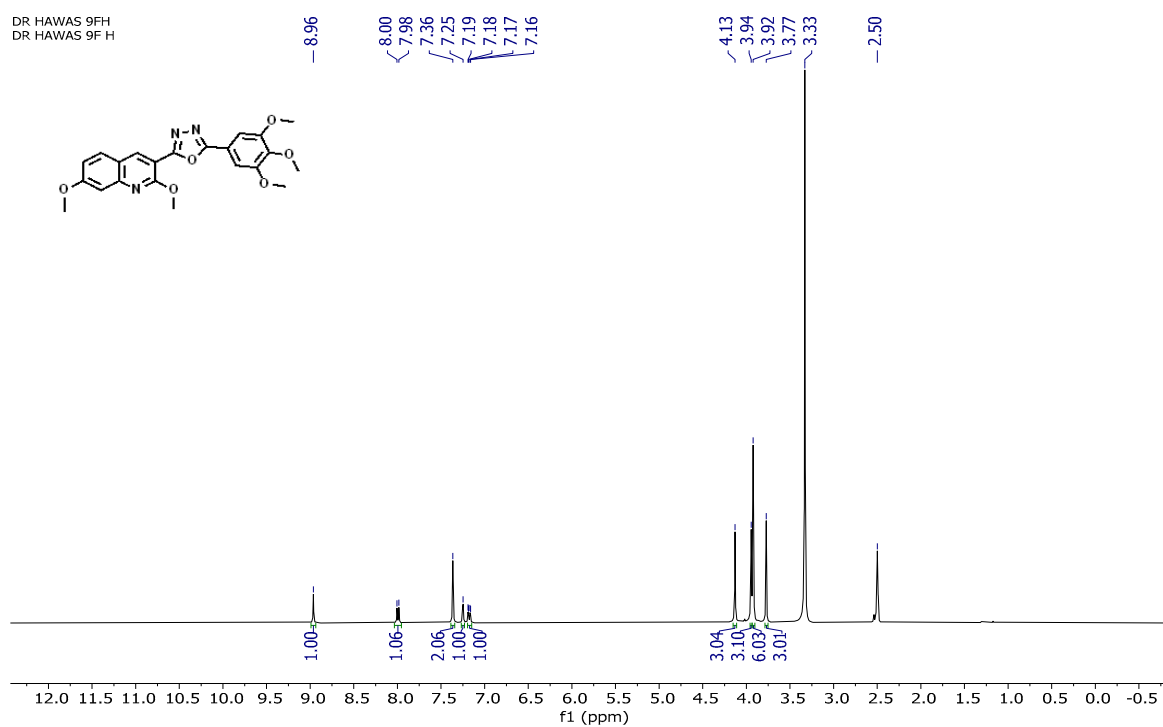

**Figure S32;  $^{13}\text{C}$  NMR for compound 20f**

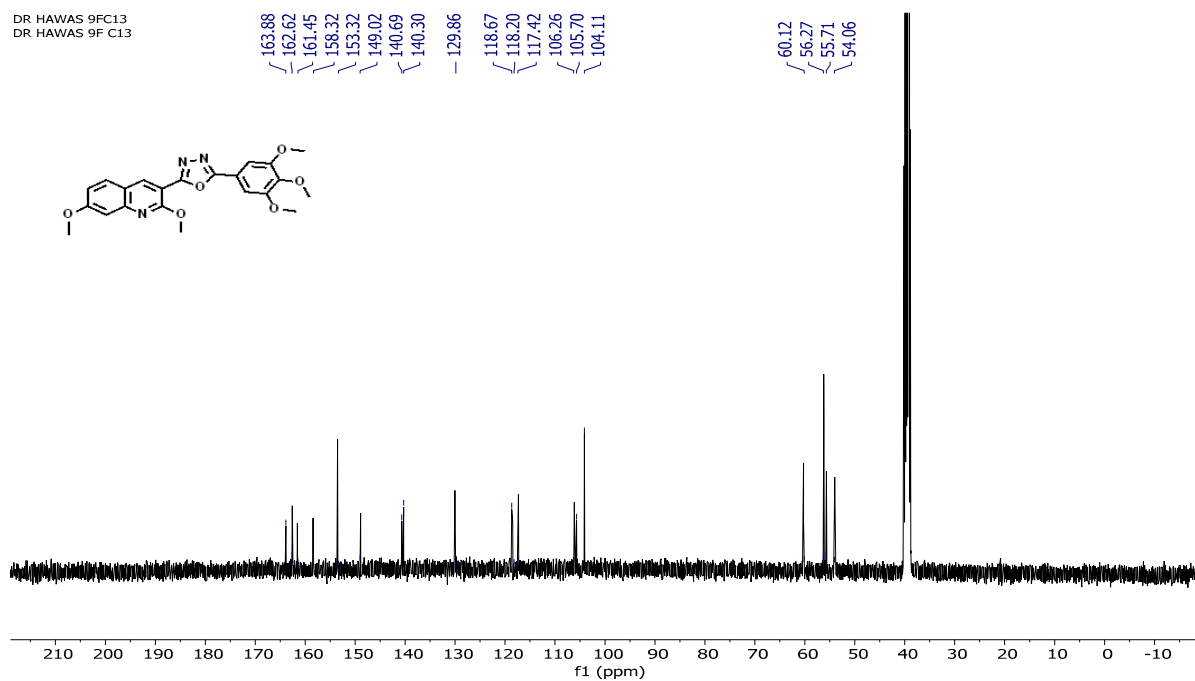

**Figure S33;  $^1\text{H}$  NMR for compound 20g**

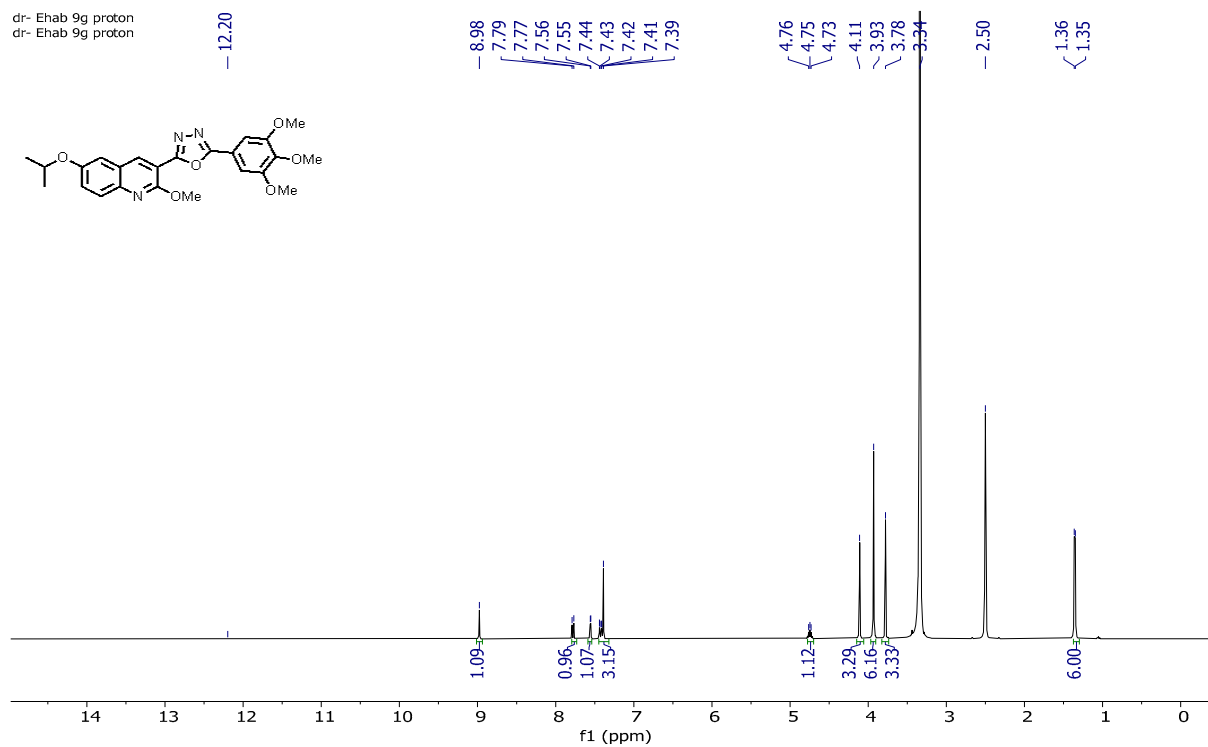

**Figure S34;  $^{13}\text{C}$  NMR for compound 20g**

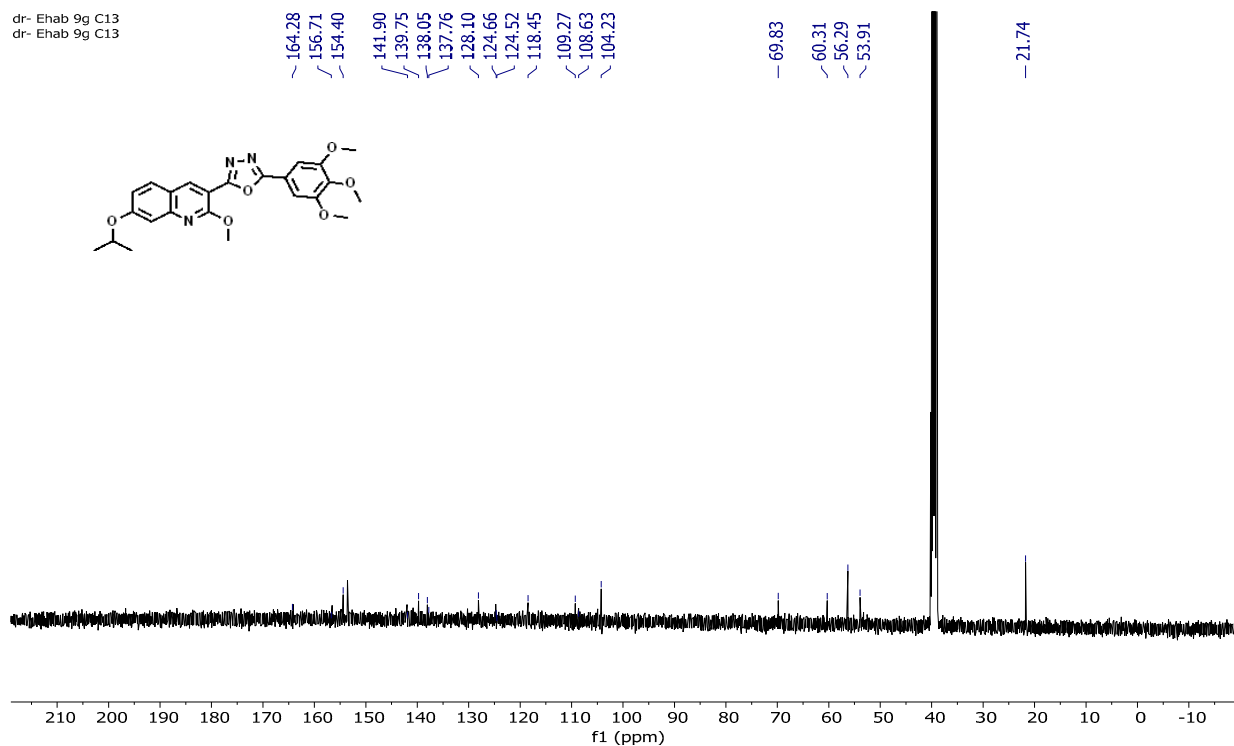

**Figure S35;  $^1\text{H}$  NMR f for compound 20h**

Jul02-2018-abeer  
M MOSTAFA-9G  
PROTON\_BS DMSO {C:\data} abeer 12

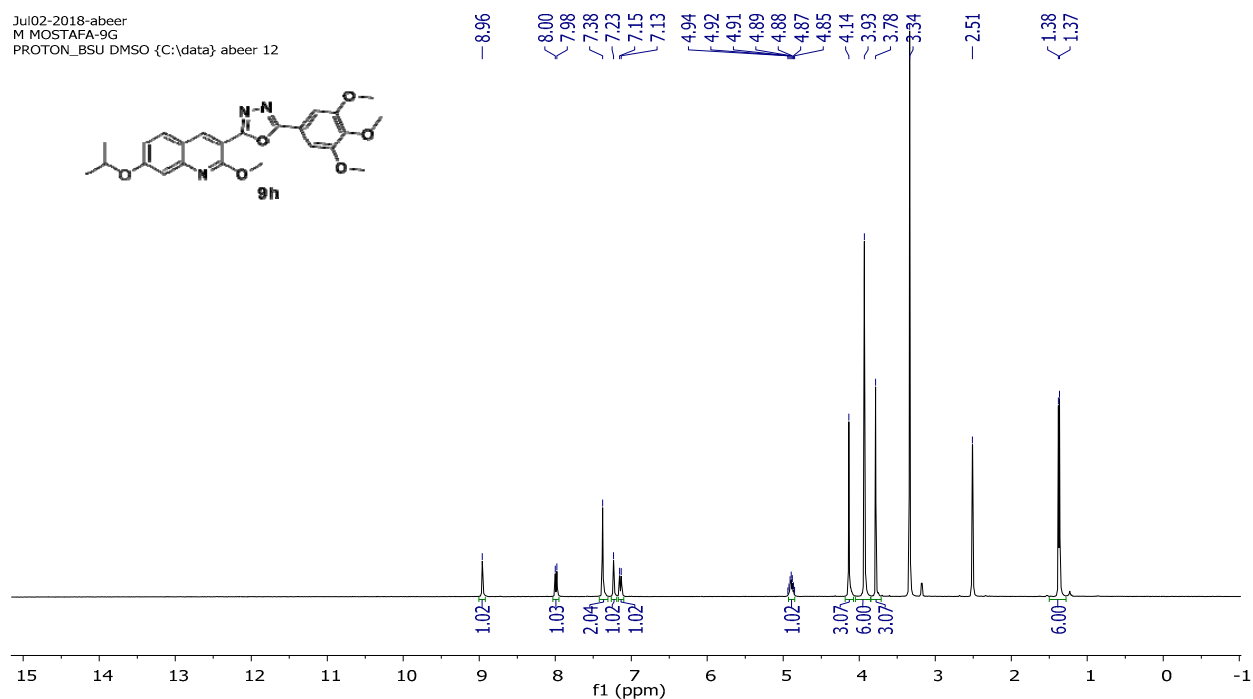

**Figure S36;  $^{13}\text{C}$  NMR for compound 20h**

dr-Hwas 9h C13  
dr-Hawas 9h C13

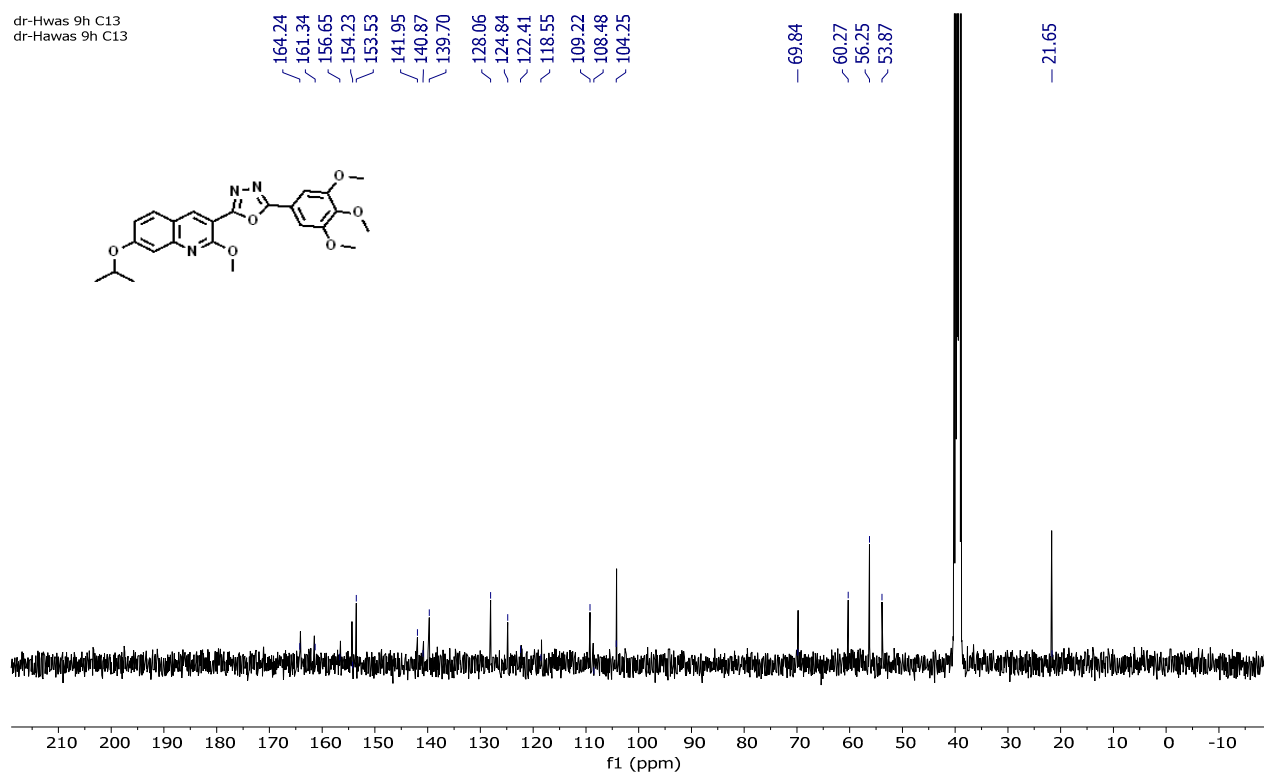

**Figure S37;  $^1\text{H}$  NMR for compound 20i**

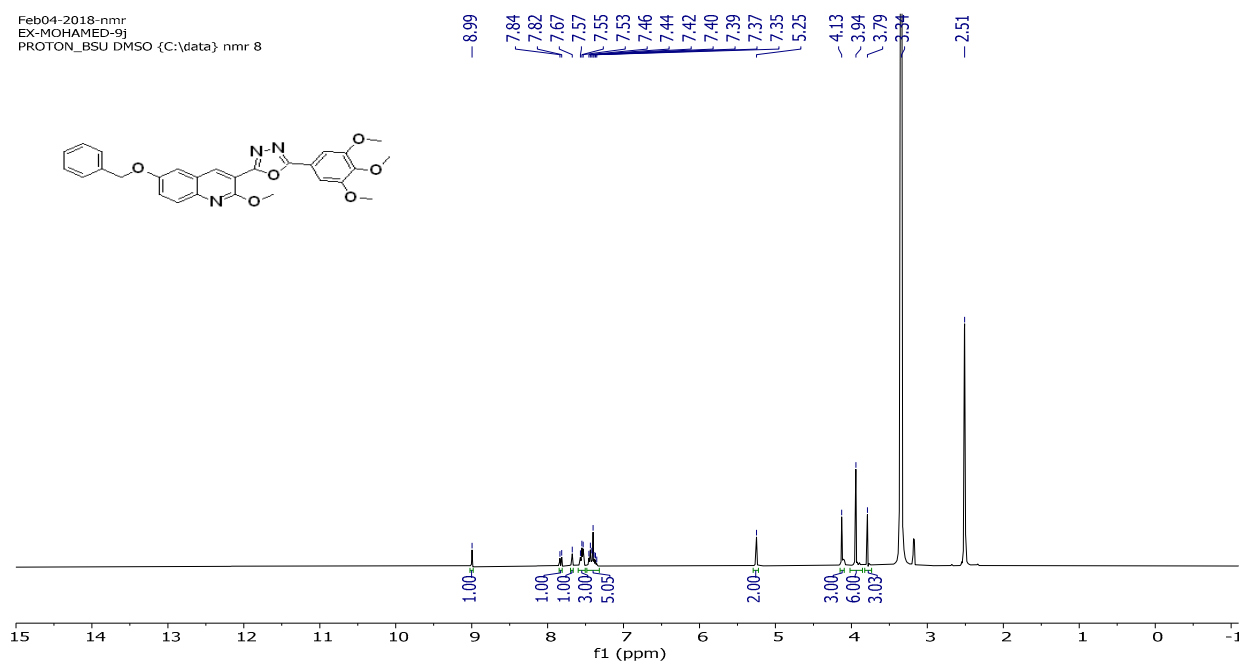

**Figure S38;  $^{13}\text{C}$  NMR for compound 20i**

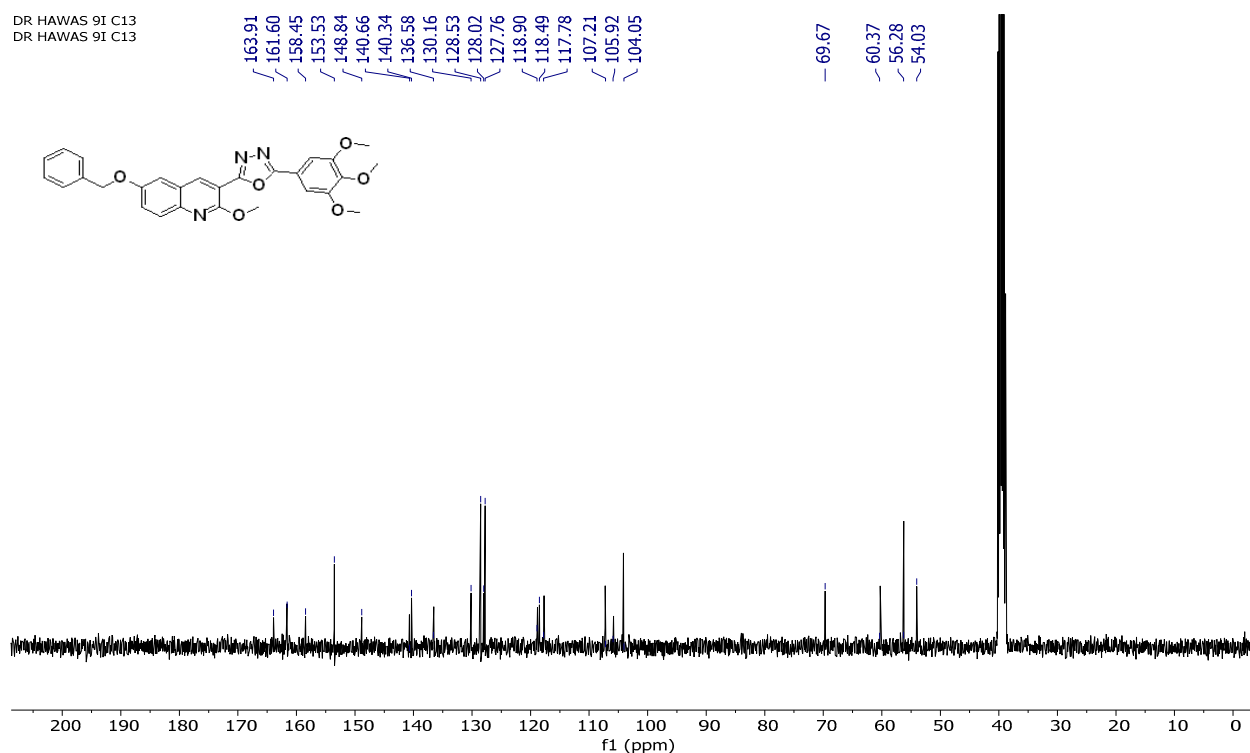

Figure S39;  $^1\text{H}$  NMR for compound 20j

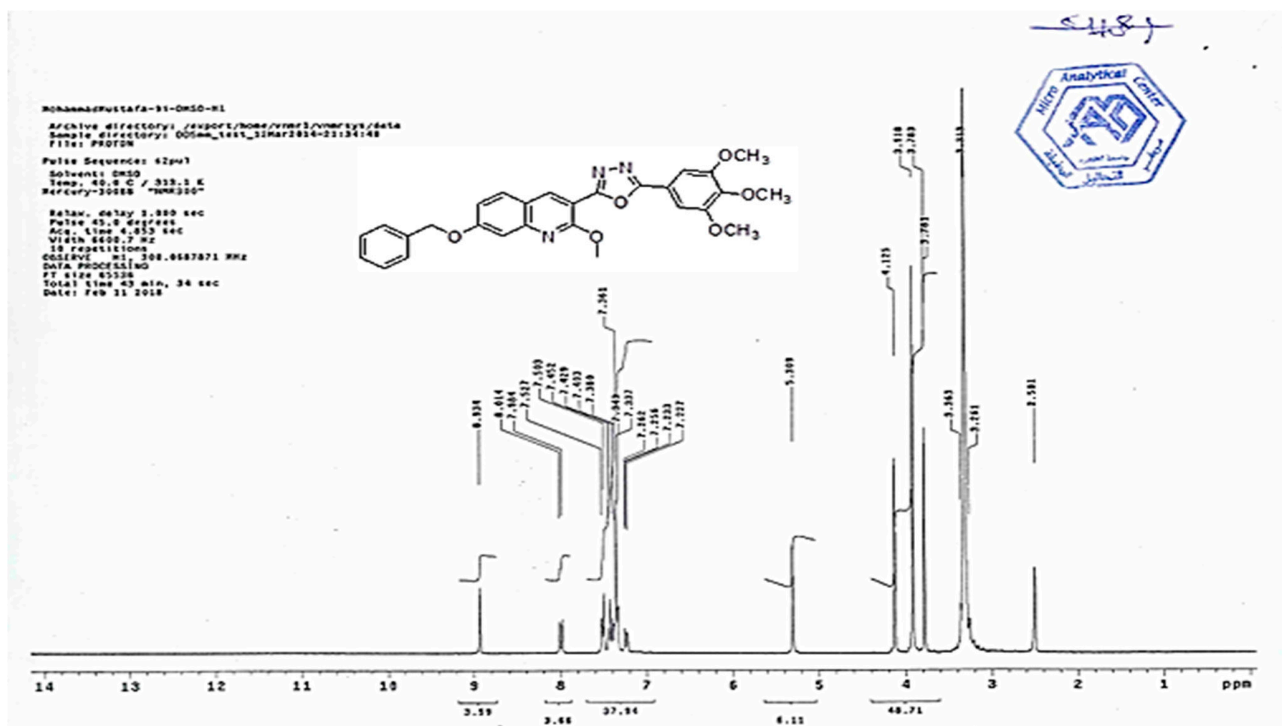

Figure S40;  $^{13}\text{C}$  NMR for compound 20j

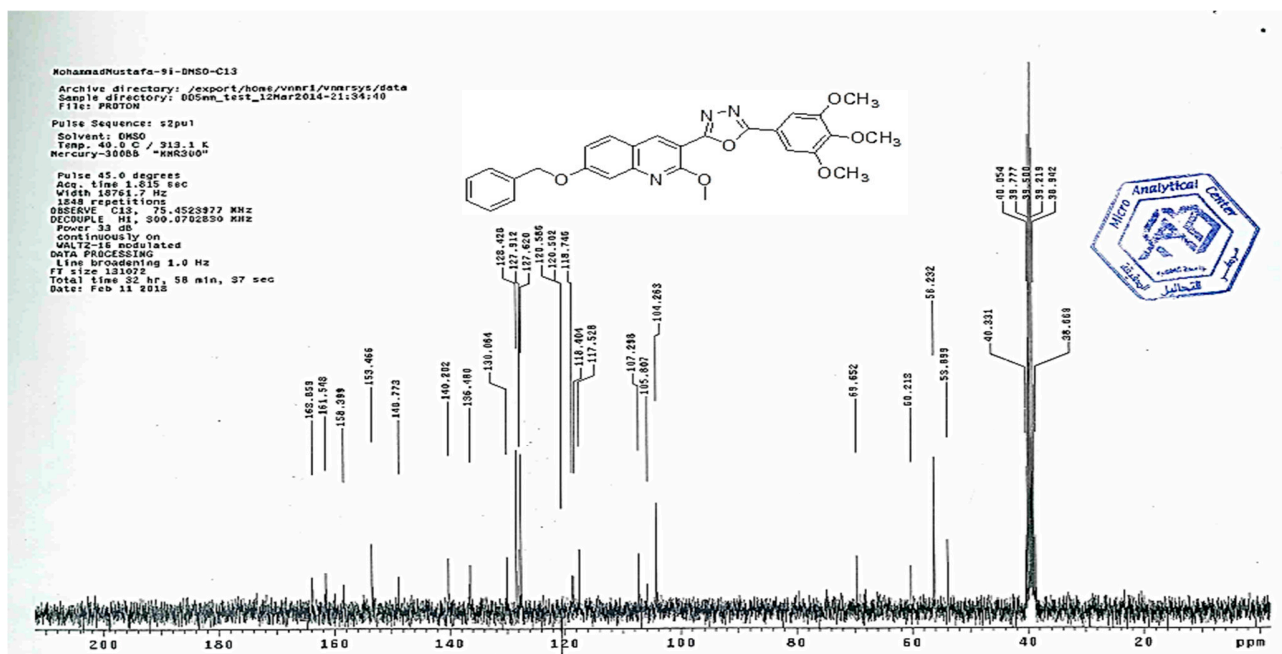

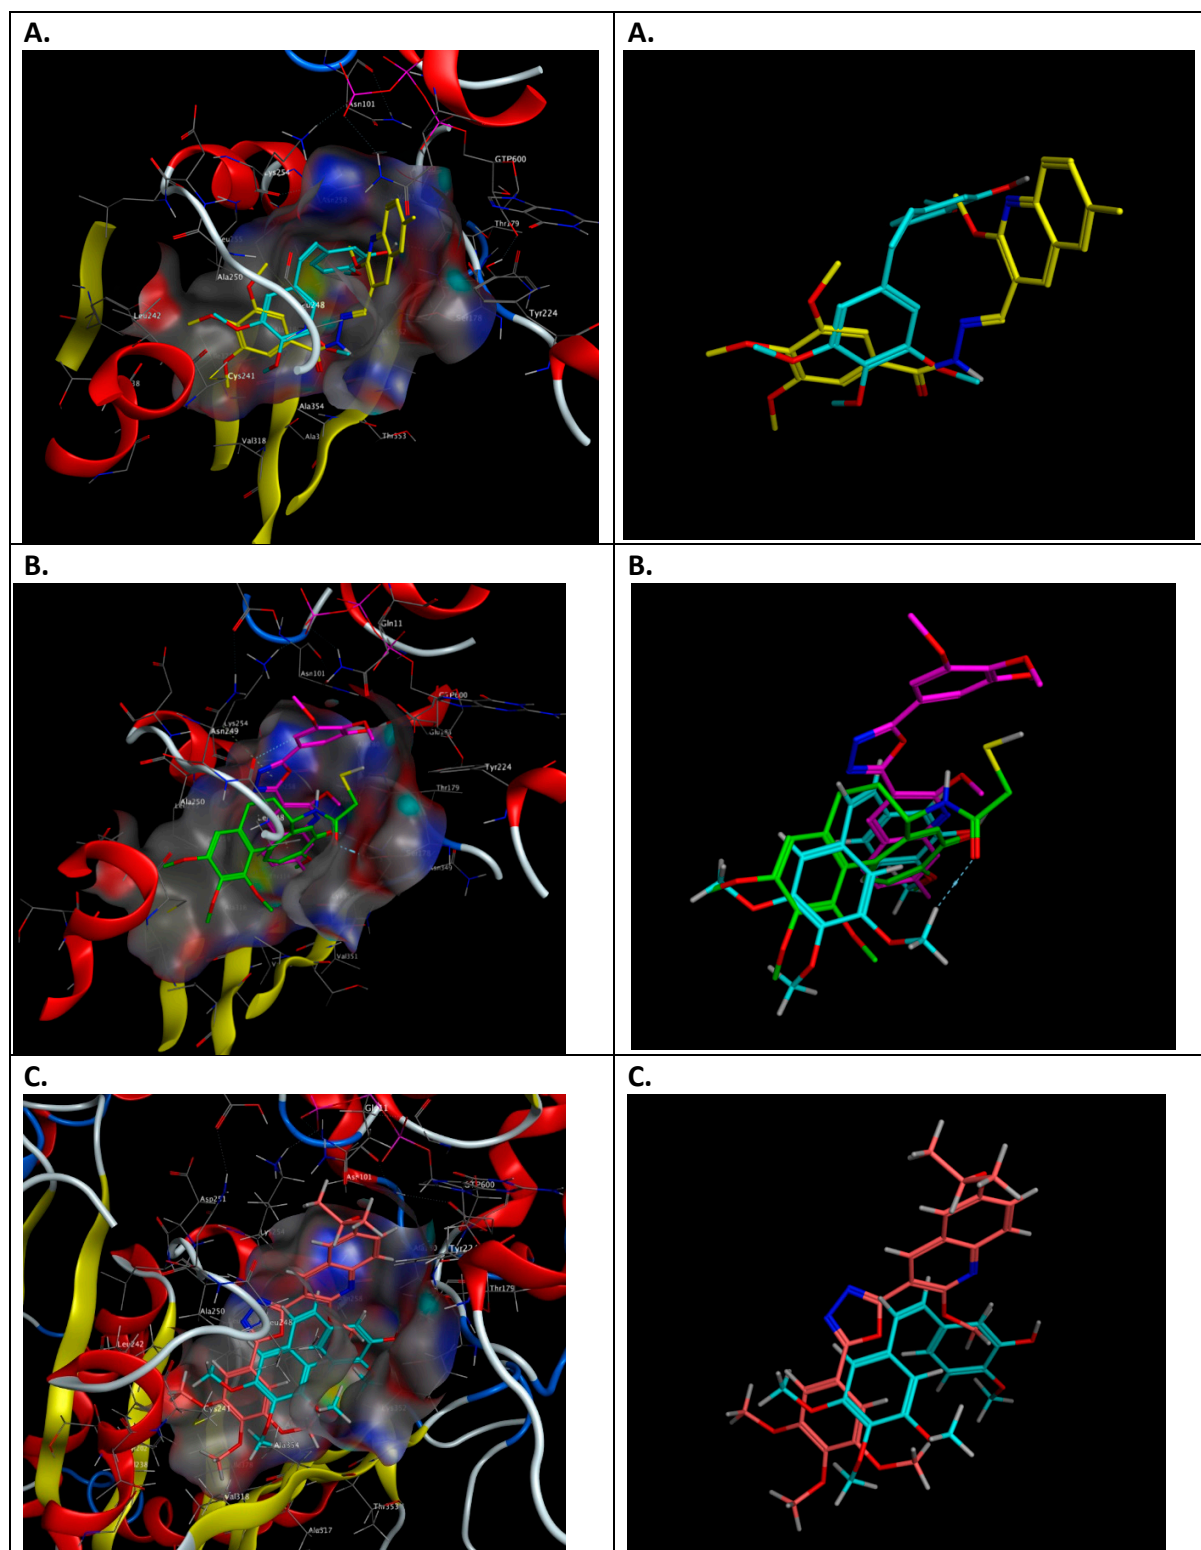

Figure S41. **A.** Quinoline **19b** (yellow) and CA-4 (cyan) docked at the colchicine-binding site of tubulin in co-crystal 1SAO. **B.** Quinoline **20c** (pink) and DAMA-colchicine (green) docked at the colchicine-binding site of tubulin in co-crystal 1SAO. **C.** Quinoline **9=20g** (red) and CA-4 (cyan) docked at the colchicine-binding site of tubulin in co-crystal 1SAO. Protein residues removed on right for clarity. (red = oxygen, grey = hydrogen).

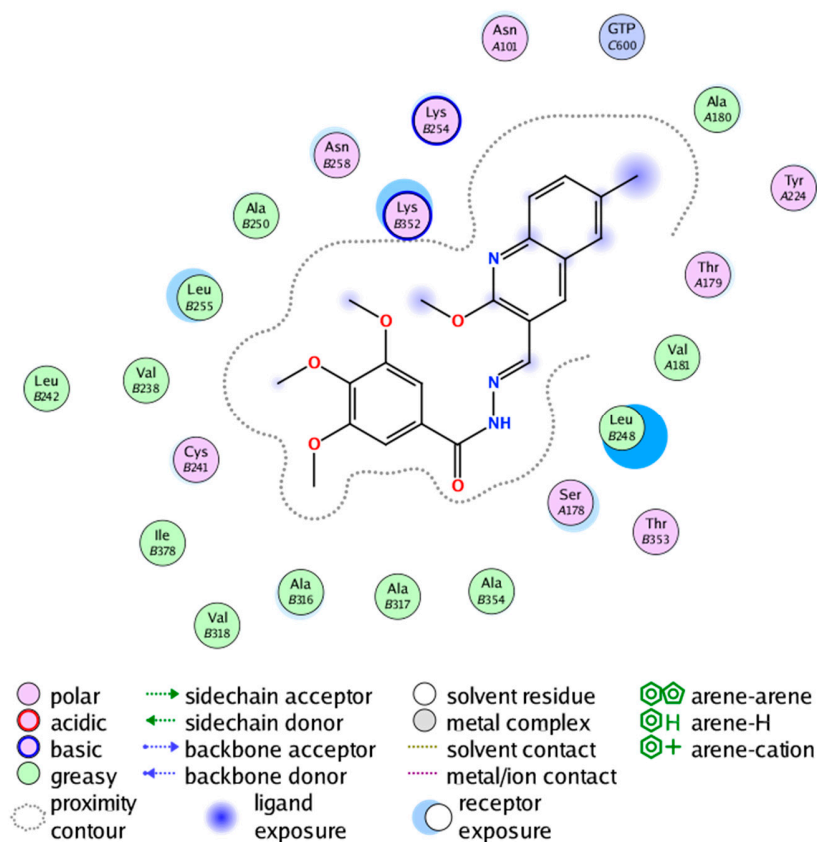

Figure S42. 2D Ligand Interaction Schematic for **19b** as generated by MOE

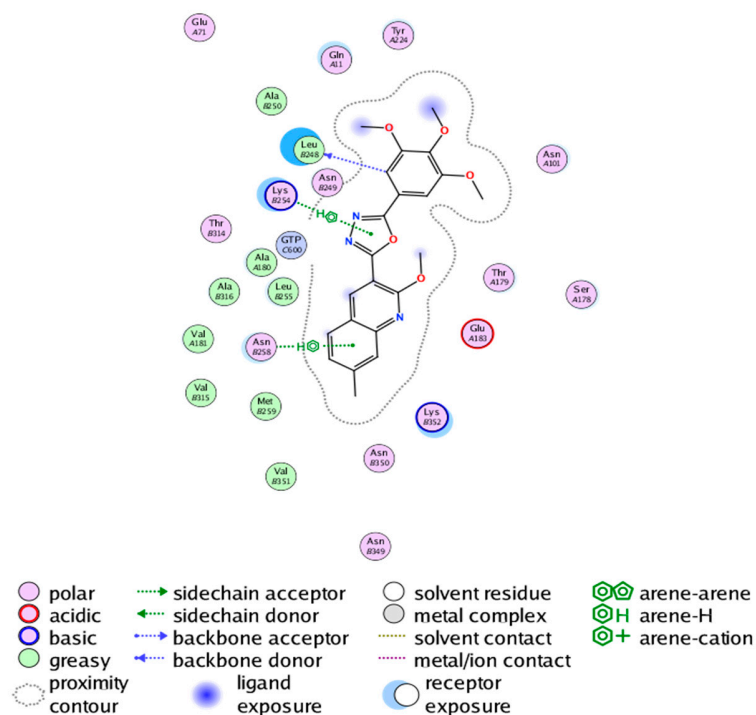

Figure S43. 2D Ligand Interaction Schematic for **20c** as generated by MOE



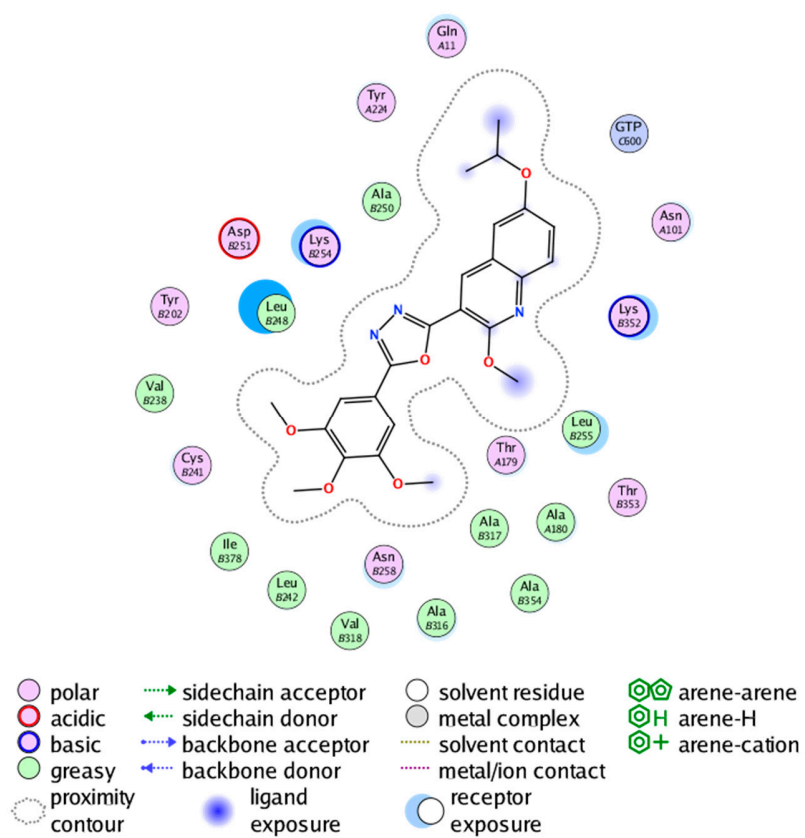

Figure S44. 2D Ligand Interaction Schematic for **20g** as generated by MOE
